# Supplementary material for: A DNA methylation fingerprint of 1628 human samples
Source: HighWire-hosted journal article supplement (doi:10.1101/gr.119867.110), 2011-05-25
Supplement: Supplementary_Tables.pdf [file Supplementary_Tables.pdf]

**Supplementary Table 1.** Complete list of 1,628 human samples included in the study

| <b>Normal Tissues<br/>(n: 424)</b> | n   | <b>Tumorigenic Samples<br/>(n: 1054)</b> | n   | <b>Non-cancerous diseases<br/>(n: 150)</b>                                                           | n  |
|------------------------------------|-----|------------------------------------------|-----|------------------------------------------------------------------------------------------------------|----|
| <i>Primary tissues (n: 390)</i>    |     | <i>Solid tumors (n: 611)</i>             |     | <i>Aorta (n: 18)</i>                                                                                 |    |
| Aorta                              | 2   | Bladder                                  | 44  | Atherosclerotic lesions                                                                              | 18 |
| Apheresis                          | 4   | Breast                                   | 76  |                                                                                                      |    |
| Bladder                            | 8   | Cervix                                   | 4   | <i>Blood (n: 86)</i>                                                                                 |    |
| Blood                              | 180 | Colon                                    | 110 | Lupus                                                                                                | 7  |
| Bone marrow                        | 14  | Endometrium                              | 68  | Autism                                                                                               | 30 |
| Brain                              | 6   | Esophagus                                | 13  | Alzheimer                                                                                            | 35 |
| Breast                             | 2   | Ganglioneurom                            | 1   | Primary biliary cirrhosis (PBC)                                                                      | 4  |
| Buccal epithelium                  | 21  | Glioma                                   | 90  | Systemic sclerosis (SSc)                                                                             | 10 |
| Cerebellum                         | 1   | Head-neck                                | 9   |                                                                                                      |    |
| Cervix                             | 1   | Kidney                                   | 5   | <i>Brain (n: 26)</i>                                                                                 |    |
| Colon                              | 97  | Liver                                    | 19  | Alzheimer                                                                                            | 11 |
| Endometrium                        | 2   | Melanoma                                 | 21  | Dementia (with Lewy bodies)                                                                          | 13 |
| Esophagus                          | 5   | Neuroblastoma                            | 16  | Parkinson                                                                                            | 1  |
| Fetal brain                        | 1   | Non-small Cell Lung Carcinoma            | 23  |                                                                                                      |    |
| Heart                              | 2   | Ovarian                                  | 30  | <i>Muscle (n: 17)</i>                                                                                |    |
| Liver                              | 5   | Pancreas*                                | 29  | Myopathies                                                                                           | 17 |
| Lung                               | 3   | Prostate                                 | 14  |                                                                                                      |    |
| Muscle                             | 5   | Stomach                                  | 16  |                                                                                                      |    |
| Ovary                              | 2   | Testis                                   | 23  | <i>Immunodeficiency, Centromere<br/>instability and Facial anomalies<br/>syndrome (ICF syndrome)</i> | 4  |
| Pancreas                           | 7   |                                          |     |                                                                                                      |    |
| Prostate                           | 5   | <i>Hematologic malignancies (n: 244)</i> |     |                                                                                                      |    |
| Skin                               | 5   | Acute lymphoblastic leukemia (ALL)       | 58  |                                                                                                      |    |
| Stomach                            | 7   | Acute myeloblastic leukemia (AML)        | 34  |                                                                                                      |    |
| Suprarenal gland                   | 1   | Chronic lymphocytic leukemia (CLL)       | 25  |                                                                                                      |    |
| Testis                             | 4   | Diffuse large B-cell lymphoma (DLBCL)    | 49  |                                                                                                      |    |
|                                    |     | Follicular lymphoma (FL)                 | 14  |                                                                                                      |    |
| <i>Normal cell lines (n: 7)</i>    |     | Mantle cell lymphoma (MCL)               | 10  |                                                                                                      |    |
| Lymphoblastoid                     | 6   | Molecular Burkitt's lymphoma (mBL)       | 18  |                                                                                                      |    |
| Melanocyte                         | 1   | Multiple myeloma (MM)                    | 14  |                                                                                                      |    |
|                                    |     | Myeloproliferative syndromes (MDS/MPS)   | 13  |                                                                                                      |    |
| <i>Stem Cells (n: 27)</i>          |     | Mixed lineage leukemia                   | 9   |                                                                                                      |    |
| Adult                              | 19  |                                          |     |                                                                                                      |    |
| Embryonic                          | 8   | <i>Metastases (n:50)</i>                 |     |                                                                                                      |    |
|                                    |     | Colon to Liver                           | 32  |                                                                                                      |    |
|                                    |     | Colon to Brain                           | 13  |                                                                                                      |    |
|                                    |     | Kidney to Brain                          | 5   |                                                                                                      |    |
|                                    |     | <i>Premalignant lesions (n: 25)</i>      |     |                                                                                                      |    |
|                                    |     | Adenomas (colon)                         | 12  |                                                                                                      |    |
|                                    |     | Breast                                   | 7   |                                                                                                      |    |
|                                    |     | Endometrium hyperplasia                  | 6   |                                                                                                      |    |
|                                    |     | <i>Cancer cell lines (n: 82)</i>         |     |                                                                                                      |    |
|                                    |     | Breast                                   | 6   |                                                                                                      |    |
|                                    |     | Cervix                                   | 4   |                                                                                                      |    |
|                                    |     | Colon                                    | 10  |                                                                                                      |    |
|                                    |     | Esophagus                                | 2   |                                                                                                      |    |
|                                    |     | Head-neck                                | 2   |                                                                                                      |    |
|                                    |     | Leukemia                                 | 3   |                                                                                                      |    |
|                                    |     | Liver                                    | 3   |                                                                                                      |    |
|                                    |     | Lung                                     | 10  |                                                                                                      |    |
|                                    |     | Lymphoma                                 | 23  |                                                                                                      |    |
|                                    |     | Melanocyte                               | 2   |                                                                                                      |    |
|                                    |     | Neuroblastoma                            | 2   |                                                                                                      |    |
|                                    |     | Pancreas                                 | 12  |                                                                                                      |    |
|                                    |     | Prostate                                 | 3   |                                                                                                      |    |
|                                    |     | <i>Carcinoma of unknow primary (CUP)</i> | 42  |                                                                                                      |    |

**Supplementary Table 2.** List of CpG sites methylated in all normal samples studied. CGI: CpG Island associated (Y) or not associated (N). TSS: transcription start site.

| CpG site (n: 17) | CGI | Annotation                                                                                      | Distance to TSS |
|------------------|-----|-------------------------------------------------------------------------------------------------|-----------------|
| AFF3_P808_F      | N   | AF4/FMR2 family, member 3 (AFF3), transcript variant 2                                          | -808            |
| BCL2A1_P1127_R   | Y   | BCL2-related protein A1 (BCL2A1)                                                                | -1127           |
| CD1A_P414_R      | N   | CD1a antigen (CD1A)                                                                             | -414            |
| GNG7_E310_R      | Y   | guanine nucleotide binding protein (G protein), gamma 7 (GNG7)                                  | 310             |
| MMP1_P397_R      | N   | matrix metalloproteinase 1 (interstitial collagenase) (MMP1)                                    | -397            |
| MMP1_P460_F      | N   | matrix metalloproteinase 1 (interstitial collagenase) (MMP1)                                    | -460            |
| PWCR1_E81_R      | N   | Prader-Willi syndrome chromosome region 1 (PWCR1) on chromosome 15                              | 81              |
| SLC22A2_E271_R   | Y   | solute carrier family 22 (organic cation transporter), member 2 (SLC22A2), transcript variant 2 | 271             |
| TIMP3_P1114_R    | N   | TIMP metalloproteinase inhibitor 3 (Sorsby fundus dystrophy, pseudoinflammatory) (TIMP3)        | -1114           |
| TIMP3_P690_R     | N   | TIMP metalloproteinase inhibitor 3 (Sorsby fundus dystrophy, pseudoinflammatory) (TIMP3)        | -690            |
| TNF_P1084_F      | N   | tumor necrosis factor (TNF superfamily, member 2) (TNF)                                         | -1084           |
| UGT1A1_P564_R    | N   | UDP glucuronosyltransferase 1 family, polypeptide A1 (UGT1A1)                                   | -564            |
| UGT1A7_P751_R    | N   | UDP glucuronosyltransferase 1 family, polypeptide A7 (UGT1A7)                                   | -751            |
| USP29_E274_F     | N   | ubiquitin specific peptidase 29 (USP29)                                                         | 274             |
| XRCC2_P1077_F    | N   | X-ray repair complementing defective repair in Chinese hamster cells 2 (XRCC2)                  | -1077           |
| ZIM3_E203_F      | N   | zinc finger, imprinted 3 (ZIM3)                                                                 | 203             |
| ZNFN1A1_P179_F   | N   | zinc finger protein, subfamily 1A, 1 (Ikaros) (ZNFN1A1)                                         | -179            |

**Supplementary Table 3.** List of CpG sites unmethylated in all the normal tissues studied. CpG island associated (CGI): Yes (Y) or not (N). TSS: transcription start site.

| CpG site (n: 488) | CGI | Annotation                                                                                                                         | Distance to TSS |
|-------------------|-----|------------------------------------------------------------------------------------------------------------------------------------|-----------------|
| ABCA1_E120_R      | Y   | ATP-binding cassette, sub-family A (ABC1), member 1 (ABCA1)                                                                        | 120             |
| ABCA1_P45_F       | Y   | ATP-binding cassette, sub-family A (ABC1), member 1 (ABCA1)                                                                        | -45             |
| ABCC5_P444_F      | Y   | ATP-binding cassette, sub-family C (CFTR/MRP), member 5 (ABCC5), transcript variant 1                                              | -444            |
| ABCG2_P178_R      | Y   | ATP-binding cassette, sub-family G (WHITE), member 2 (ABCG2)                                                                       | -178            |
| ABCG2_P310_R      | Y   | ATP-binding cassette, sub-family G (WHITE), member 2 (ABCG2)                                                                       | -310            |
| ABL1_P53_F        | Y   | v-abl Abelson murine leukemia viral oncogene homolog 1 (ABL1), transcript variant a                                                | -53             |
| ABL2_P459_R       | Y   | v-abl Abelson murine leukemia viral oncogene homolog 2 (arg, Abelson-related gene) (ABL2), transcript variant b                    | -459            |
| ABO_E110_F        | Y   | ABO blood group (transferase A, alpha 1-3-N-acetylgalactosaminyltransferase; transferase B, alpha 1-3-galactosyltransferase) (ABO) | 110             |
| ACVR1B_E497_R     | Y   | activin A receptor, type IB (ACVR1B), transcript variant 1                                                                         | 497             |
| ACVR1C_P115_R     | Y   | activin A receptor, type IC (ACVR1C)                                                                                               | -115            |
| ACVR1C_P363_F     | Y   | activin A receptor, type IC (ACVR1C)                                                                                               | -363            |
| ACVR2B_E27_R      | Y   | activin A receptor, type IIB (ACVR2B)                                                                                              | 27              |
| ACVR2B_P676_F     | Y   | activin A receptor, type IIB (ACVR2B)                                                                                              | -676            |
| ADAMTS12_P250_R   | Y   | ADAM metalloproteinase with thrombospondin type 1 motif, 12 (ADAMTS12)                                                             | -250            |
| ADCYAP1_E163_R    | Y   | adenylate cyclase activating polypeptide 1 (pituitary) (ADCYAP1)                                                                   | 163             |
| AGTR1_P41_F       | Y   | angiotensin II receptor, type 1 (AGTR1), transcript variant 1                                                                      | -41             |
| AHR_E103_F        | Y   | aryl hydrocarbon receptor (AHR)                                                                                                    | 103             |
| AHR_P166_R        | Y   | aryl hydrocarbon receptor (AHR)                                                                                                    | -166            |
| AKT1_P310_R       | Y   | v-akt murine thymoma viral oncogene homolog 1 (AKT1), transcript variant 2                                                         | -310            |
| ALK_E183_R        | Y   | anaplastic lymphoma kinase (Ki-1) (ALK)                                                                                            | 183             |
| ALK_P28_F         | Y   | anaplastic lymphoma kinase (Ki-1) (ALK)                                                                                            | -28             |
| ALPL_P278_F       | Y   | alkaline phosphatase, liver/bone/kidney (ALPL)                                                                                     | -278            |
| APBA1_E99_R       | Y   | amyloid beta (A4) precursor protein-binding, family A, member 1 (X11) (APBA1)                                                      | 99              |
| APBA1_P644_F      | Y   | amyloid beta (A4) precursor protein-binding, family A, member 1 (X11) (APBA1)                                                      | -644            |
| APP_E8_F          | Y   | amyloid beta (A4) precursor protein (peptidase nexin-II, Alzheimer disease) (APP), transcript variant 2                            | 8               |
| APP_P179_R        | Y   | amyloid beta (A4) precursor protein (peptidase nexin-II, Alzheimer disease) (APP), transcript variant 2                            | -179            |
| AREG_E25_F        | Y   | amphiregulin (schwannoma-derived growth factor) (AREG)                                                                             | 25              |
| ARNT_P238_R       | Y   | aryl hydrocarbon receptor nuclear translocator (ARNT), transcript variant 2                                                        | -238            |
| ASCL1_E24_F       | Y   | achaete-scute complex-like 1 (Drosophila) (ASCL1)                                                                                  | 24              |
| BCAM_E100_R       | Y   | basal cell adhesion molecule (Lutheran blood group) (BCAM), transcript variant 2                                                   | 100             |
| BCL3_P1038_R      | Y   | B-cell CLL/lymphoma 3 (BCL3)                                                                                                       | -1038           |
| BCL6_P248_R       | Y   | B-cell CLL/lymphoma 6 (zinc finger protein 51) (BCL6), transcript variant 2                                                        | -248            |
| BDNF_E19_R        | Y   | brain-derived neurotrophic factor (BDNF), transcript variant 5                                                                     | 19              |
| BMP2_E48_R        | Y   | bone morphogenetic protein 2 (BMP2)                                                                                                | 48              |
| BMP2_P1201_F      | Y   | bone morphogenetic protein 2 (BMP2)                                                                                                | -1201           |
| BMP3_E147_F       | Y   | bone morphogenetic protein 3 (osteogenic) (BMP3)                                                                                   | 147             |
| BMP3_P56_R        | Y   | bone morphogenetic protein 3 (osteogenic) (BMP3)                                                                                   | -56             |
| BMP6_P163_F       | Y   | bone morphogenetic protein 6 (BMP6)                                                                                                | -163            |
| BMP6_P398_F       | Y   | bone morphogenetic protein 6 (BMP6)                                                                                                | -398            |
| BMPR1A_P956_F     | Y   | bone morphogenetic protein receptor, type IA (BMPR1A)                                                                              | -956            |

## Supplementary Table 3 (cont.)

|                 |   |                                                                                                                                                   |       |
|-----------------|---|---------------------------------------------------------------------------------------------------------------------------------------------------|-------|
| BMPR2_E435_F    | Y | bone morphogenetic protein receptor, type II (serine/threonine kinase) (BMPR2)                                                                    | 435   |
| BMPR2_P1271_F   | Y | bone morphogenetic protein receptor, type II (serine/threonine kinase) (BMPR2)                                                                    | -1271 |
| BSG_P211_R      | Y | basigin (Ok blood group) (BSG), transcript variant 1                                                                                              | -211  |
| C20orf47_P225_R | Y | ERGIC and golgi 3 (ERGIC3), transcript variant 2                                                                                                  | -225  |
| CALCA_P75_F     | Y | calcitonin/calcitonin-related polypeptide, alpha (CALCA), transcript variant 2                                                                    | -75   |
| CASP2_P192_F    | Y | caspase 2, apoptosis-related cysteine peptidase (neural precursor cell expressed, developmentally down-regulated 2) (CASP2), transcript variant 1 | -192  |
| CASP3_P420_R    | Y | caspase 3, apoptosis-related cysteine peptidase (CASP3), transcript variant alpha                                                                 | 147   |
| CASP6_P201_F    | Y | caspase 6, apoptosis-related cysteine peptidase (CASP6), transcript variant alpha                                                                 | -201  |
| CASP6_P230_R    | Y | caspase 6, apoptosis-related cysteine peptidase (CASP6), transcript variant alpha                                                                 | -230  |
| CAV1_P130_R     | Y | caveolin 1, caveolae protein, 22kDa (CAV1)                                                                                                        | -130  |
| CAV2_E33_R      | Y | caveolin 2 (CAV2), transcript variant 2                                                                                                           | 33    |
| CCKBR_P361_R    | Y | cholecystokinin B receptor (CCKBR)                                                                                                                | -361  |
| CCKBR_P480_F    | Y | cholecystokinin B receptor (CCKBR)                                                                                                                | -480  |
| CCNC_P132_R     | Y | cyclin C (CCNC), transcript variant 2                                                                                                             | -132  |
| CCND1_E280_R    | Y | cyclin D1 (PRAD1: parathyroid adenomatosis 1) (CCND1)                                                                                             | 280   |
| CCND1_P343_R    | Y | cyclin D1 (PRAD1: parathyroid adenomatosis 1) (CCND1)                                                                                             | -343  |
| CCND2_P887_F    | Y | cyclin D2 (CCND2)                                                                                                                                 | -887  |
| CCND2_P898_R    | Y | cyclin D2 (CCND2)                                                                                                                                 | -898  |
| CCND3_P435_F    | Y | cyclin D3 (CCND3)                                                                                                                                 | -435  |
| CCNE1_P683_F    | Y | cyclin E1 (CCNE1), transcript variant 2                                                                                                           | -683  |
| CD34_E20_R      | N | CD34 antigen (CD34), transcript variant 1                                                                                                         | 20    |
| CD44_E26_F      | Y | CD44 antigen (Indian blood group) (CD44), transcript variant 2                                                                                    | 26    |
| CD44_P87_F      | Y | CD44 antigen (Indian blood group) (CD44), transcript variant 2                                                                                    | -87   |
| CD9_E14_R       | Y | CD9 antigen (p24) (CD9)                                                                                                                           | 14    |
| CDC25B_E83_F    | Y | cell division cycle 25B (CDC25B), transcript variant 2                                                                                            | 83    |
| CDH1_P45_F      | Y | cadherin 1, type 1, E-cadherin (epithelial) (CDH1)                                                                                                | -45   |
| CDH1_P52_R      | Y | cadherin 1, type 1, E-cadherin (epithelial) (CDH1)                                                                                                | -52   |
| CDH11_E102_R    | Y | cadherin 11, type 2, OB-cadherin (osteoblast) (CDH11)                                                                                             | 102   |
| CDH11_P203_R    | Y | cadherin 11, type 2, OB-cadherin (osteoblast) (CDH11)                                                                                             | -203  |
| CDH3_E100_R     | Y | cadherin 3, type 1, P-cadherin (placental) (CDH3)                                                                                                 | 100   |
| CDK10_E74_F     | Y | cyclin-dependent kinase (CDC2-like) 10 (CDK10), transcript variant 2                                                                              | 74    |
| CDK6_E256_F     | Y | cyclin-dependent kinase 6 (CDK6)                                                                                                                  | 256   |
| CDK6_P291_R     | Y | cyclin-dependent kinase 6 (CDK6)                                                                                                                  | -1465 |
| CDKN1A_E101_F   | Y | cyclin-dependent kinase inhibitor 1A (p21, Cip1) (CDKN1A), transcript variant 1                                                                   | 101   |
| CDKN1B_P1161_F  | N | cyclin-dependent kinase inhibitor 1B (p27, Kip1) (CDKN1B)                                                                                         | -1161 |
| CDKN1C_P6_R     | Y | cyclin-dependent kinase inhibitor 1C (p57, Kip2) (CDKN1C)                                                                                         | -6    |
| CDKN1C_P626_F   | Y | cyclin-dependent kinase inhibitor 1C (p57, Kip2) (CDKN1C)                                                                                         | -626  |
| CDKN2B_E220_F   | Y | cyclin-dependent kinase inhibitor 2B (p15, inhibits CDK4) (CDKN2B), transcript variant 1                                                          | 220   |
| CEBPA_P1163_R   | Y | CCAAT/enhancer binding protein (C/EBP), alpha (CEBPA)                                                                                             | .     |
| CEBPA_P706_F    | Y | CCAAT/enhancer binding protein (C/EBP), alpha (CEBPA)                                                                                             | 293   |
| CFTR_P115_F     | Y | cystic fibrosis transmembrane conductance regulator, ATP-binding cassette (sub-family C, member 7) (CFTR)                                         | -115  |
| CHFR_P501_F     | Y | checkpoint with forkhead and ring finger domains (CHFR)                                                                                           | -501  |

## Supplementary Table 3 (cont.)

|                     |   |                                                                                                                                 |      |
|---------------------|---|---------------------------------------------------------------------------------------------------------------------------------|------|
| CHFR_P635_R         | Y | checkpoint with forkhead and ring finger domains (CHFR)                                                                         | -635 |
| COL18A1_P365_R      | Y | collagen, type XVIII, alpha 1 (COL18A1), transcript variant 3                                                                   | -365 |
| COL4A3_E205_R       | Y | collagen, type IV, alpha 3 (Goodpasture antigen) (COL4A3), transcript variant 6                                                 | 205  |
| COL4A3_P545_F       | Y | collagen, type IV, alpha 3 (Goodpasture antigen) (COL4A3), transcript variant 6                                                 | -545 |
| COL6A1_P283_F       | Y | collagen, type VI, alpha 1 (COL6A1)                                                                                             | -283 |
| COL6A1_P425_F       | Y | collagen, type VI, alpha 1 (COL6A1)                                                                                             | -425 |
| COMT_E401_F         | N | catechol-O-methyltransferase (COMT), transcript variant S-COMT                                                                  | -195 |
| COPG2_P298_F        | Y | coatamer protein complex, subunit gamma 2 (COPG2)                                                                               | -298 |
| CPNE1_P138_F        | Y | copine I (CPNE1), transcript variant 4                                                                                          | -138 |
| CSK_P740_R          | Y | c-src tyrosine kinase (CSK)                                                                                                     | -740 |
| CSTB_E410_F         | Y | cystatin B (stefin B) (CSTB)                                                                                                    | 410  |
| CTGF_E156_F         | Y | connective tissue growth factor (CTGF)                                                                                          | 156  |
| CTNNA1_P185_R       | Y | catenin (cadherin-associated protein), alpha 1, 102kDa (CTNNA1)                                                                 | -185 |
| CTNNA1_P382_R       | Y | catenin (cadherin-associated protein), alpha 1, 102kDa (CTNNA1)                                                                 | -382 |
| CTSH_E157_R         | Y | cathepsin H (CTSH), transcript variant 2                                                                                        | 157  |
| CTSH_P238_F         | Y | cathepsin H (CTSH), transcript variant 2                                                                                        | -238 |
| CTSL_P81_F          | Y | cathepsin L (CTSL), transcript variant 1                                                                                        | -81  |
| CYP1A1_P382_F       | Y | cytochrome P450, family 1, subfamily A, polypeptide 1 (CYP1A1)                                                                  | -382 |
| CYP1B1_E83_R        | Y | cytochrome P450, family 1, subfamily B, polypeptide 1 (CYP1B1)                                                                  | 83   |
| CYP1B1_P212_F       | Y | cytochrome P450, family 1, subfamily B, polypeptide 1 (CYP1B1)                                                                  | -212 |
| DAB2_P35_F          | Y | disabled homolog 2, mitogen-responsive phosphoprotein (Drosophila) (DAB2)                                                       | -35  |
| DAB2_P468_F         | Y | disabled homolog 2, mitogen-responsive phosphoprotein (Drosophila) (DAB2)                                                       | -468 |
| DAB2IP_P9_F         | Y | DAB2 interacting protein (DAB2IP), transcript variant 1                                                                         | -9   |
| DAPK1_P10_F         | Y | death-associated protein kinase 1 (DAPK1)                                                                                       | -10  |
| DDR1_E23_R          | Y | discoidin domain receptor family, member 1 (DDR1), transcript variant 2                                                         | 23   |
| DHCR24_P406_R       | Y | 24-dehydrocholesterol reductase (DHCR24)                                                                                        | -406 |
| DKFZP564O0823_E45_F | Y | DKFZP564O0823 protein (DKFZP564O0823)                                                                                           | 45   |
| DLL1_P386_F         | Y | delta-like 1 (Drosophila) (DLL1)                                                                                                | -386 |
| DNMT1_P100_R        | Y | DNA (cytosine-5-)-methyltransferase 1 (DNMT1)                                                                                   | -100 |
| DSP_P36_F           | Y | desmoplakin (DSP), transcript variant 1                                                                                         | -36  |
| DSP_P440_R          | Y | desmoplakin (DSP), transcript variant 1                                                                                         | -440 |
| DST_E31_F           | Y | dystonin (DST), transcript variant 1eB                                                                                          | 31   |
| DST_P262_R          | Y | dystonin (DST), transcript variant 1eB                                                                                          | -262 |
| DUSP4_E61_F         | Y | dual specificity phosphatase 4 (DUSP4), transcript variant 1                                                                    | 61   |
| DUSP4_P925_R        | Y | dual specificity phosphatase 4 (DUSP4), transcript variant 1                                                                    | -925 |
| E2F3_P840_R         | Y | E2F transcription factor 3 (E2F3)                                                                                               | -840 |
| EDN1_P39_R          | Y | endothelin 1 (EDN1)                                                                                                             | -39  |
| EFNA1_P591_R        | Y | ephrin-A1 (EFNA1), transcript variant 2                                                                                         | -591 |
| EFNA1_P7_F          | Y | ephrin-A1 (EFNA1), transcript variant 2                                                                                         | -7   |
| EFNB3_P442_R        | Y | ephrin-B3 (EFNB3)                                                                                                               | -442 |
| EGFR_E295_R         | Y | epidermal growth factor receptor (erythroblastic leukemia viral (v-erb-b) oncogene homolog, avian) (EGFR), transcript variant 1 | 295  |
| EGFR_P260_R         | Y | epidermal growth factor receptor (erythroblastic leukemia viral (v-erb-b) oncogene homolog, avian) (EGFR), transcript variant 1 | -260 |

## Supplementary Table 3 (cont.)

|                |   |                                                                                                                                                     |      |
|----------------|---|-----------------------------------------------------------------------------------------------------------------------------------------------------|------|
| EGR4_P479_F    | Y | early growth response 4 (EGR4)                                                                                                                      | -479 |
| EIF2AK2_E103_R | Y | eukaryotic translation initiation factor 2-alpha kinase 2 (EIF2AK2)                                                                                 | 103  |
| EIF2AK2_P313_F | Y | eukaryotic translation initiation factor 2-alpha kinase 2 (EIF2AK2)                                                                                 | -313 |
| ENC1_P484_R    | Y | ectodermal-neural cortex (with BTB-like domain) (ENC1)                                                                                              | -484 |
| EPHA1_E46_R    | Y | EPH receptor A1 (EPHA1)                                                                                                                             | 46   |
| EPHA3_E156_R   | Y | EPH receptor A3 (EPHA3), transcript variant 1                                                                                                       | 156  |
| EPHA3_P106_R   | Y | EPH receptor A3 (EPHA3), transcript variant 1                                                                                                       | -106 |
| EPHA7_E6_F     | Y | EPH receptor A7 (EPHA7)                                                                                                                             | 6    |
| EPHA7_P205_R   | Y | EPH receptor A7 (EPHA7)                                                                                                                             | -205 |
| EPHA8_P256_F   | Y | EPH receptor A8 (EPHA8), transcript variant 1                                                                                                       | -256 |
| EPHB1_P503_F   | Y | EPH receptor B1 (EPHB1)                                                                                                                             | -503 |
| EPHB2_E297_F   | Y | EPH receptor B2 (EPHB2), transcript variant 2                                                                                                       | 297  |
| EPHB3_E0_F     | Y | EPH receptor B3 (EPHB3)                                                                                                                             | 0    |
| EPHB3_P569_R   | Y | EPH receptor B3 (EPHB3)                                                                                                                             | -569 |
| EPHB4_E476_R   | Y | EPH receptor B4 (EPHB4)                                                                                                                             | 476  |
| EPHB4_P313_R   | Y | EPH receptor B4 (EPHB4)                                                                                                                             | -313 |
| EPHB6_E342_F   | Y | EPH receptor B6 (EPHB6)                                                                                                                             | 342  |
| EPHB6_P827_R   | Y | EPH receptor B6 (EPHB6)                                                                                                                             | -827 |
| EPS8_E231_F    | Y | epidermal growth factor receptor pathway substrate 8 (EPS8)                                                                                         | 231  |
| ERBB2_P59_R    | Y | v-erb-b2 erythroblastic leukemia viral oncogene homolog 2, neuro/glioblastoma derived oncogene homolog (avian) (ERBB2), transcript variant 2        | -59  |
| ERBB3_E331_F   | Y | v-erb-b2 erythroblastic leukemia viral oncogene homolog 3 (avian) (ERBB3), transcript variant 1                                                     | 331  |
| ERBB3_P870_R   | Y | v-erb-b2 erythroblastic leukemia viral oncogene homolog 3 (avian) (ERBB3), transcript variant 1                                                     | -870 |
| ERBB4_P255_F   | Y | v-erb-a erythroblastic leukemia viral oncogene homolog 4 (avian) (ERBB4)                                                                            | -255 |
| ERBB4_P541_F   | Y | v-erb-a erythroblastic leukemia viral oncogene homolog 4 (avian) (ERBB4)                                                                            | -541 |
| ERCC1_P354_F   | Y | excision repair cross-complementing rodent repair deficiency, complementation group 1 (includes overlapping antisense sequence) (ERCC1), transcript | -354 |
| ESR2_E66_F     | Y | estrogen receptor 2 (ER beta) (ESR2)                                                                                                                | 66   |
| ESR2_P162_F    | Y | estrogen receptor 2 (ER beta) (ESR2)                                                                                                                | -162 |
| ETS1_P559_R    | Y | v-ets erythroblastosis virus E26 oncogene homolog 1 (avian) (ETS1)                                                                                  | -559 |
| ETS2_P684_F    | Y | v-ets erythroblastosis virus E26 oncogene homolog 2 (avian) (ETS2)                                                                                  | -684 |
| ETS2_P835_F    | Y | v-ets erythroblastosis virus E26 oncogene homolog 2 (avian) (ETS2)                                                                                  | -835 |
| EVI1_E47_R     | Y | ecotropic viral integration site 1 (EVI1)                                                                                                           | 47   |
| EVI1_P30_R     | Y | ecotropic viral integration site 1 (EVI1)                                                                                                           | -30  |
| EXT1_E197_F    | Y | exostoses (multiple) 1 (EXT1)                                                                                                                       | 197  |
| F2R_P88_F      | Y | coagulation factor II (thrombin) receptor (F2R)                                                                                                     | -88  |
| FABP3_P598_F   | Y | fatty acid binding protein 3, muscle and heart (mammary-derived growth inhibitor) (FABP3)                                                           | -598 |
| FANCF_P13_F    | Y | Fanconi anemia, complementation group F (FANCF)                                                                                                     | -13  |
| FANCG_E207_R   | Y | Fanconi anemia, complementation group G (FANCG)                                                                                                     | 207  |
| FAS_P65_F      | Y | Fas (TNF receptor superfamily, member 6) (FAS), transcript variant 1                                                                                | -65  |
| FASTK_P257_F   | Y | Fas-activated serine/threonine kinase (FASTK), transcript variant 4                                                                                 | -257 |
| FER_E119_F     | N | fer (fps/fes related) tyrosine kinase (phosphoprotein NCP94) (FER)                                                                                  | 119  |
| FES_E34_R      | Y | feline sarcoma oncogene (FES)                                                                                                                       | 34   |
| FGF3_E198_R    | Y | fibroblast growth factor 3 (murine mammary tumor virus integration site (v-int-2) oncogene homolog) (FGF3)                                          | 198  |

## Supplementary Table 3 (cont.)

|                     |   |                                                                                                                                                   |      |
|---------------------|---|---------------------------------------------------------------------------------------------------------------------------------------------------|------|
| FGF5_E16_F          | Y | fibroblast growth factor 5 (FGF5), transcript variant 1                                                                                           | 16   |
| FGF5_P238_R         | Y | fibroblast growth factor 5 (FGF5), transcript variant 1                                                                                           | -238 |
| FGF8_E183_F         | Y | fibroblast growth factor 8 (androgen-induced) (FGF8), transcript variant B                                                                        | 183  |
| FGF8_P473_F         | Y | fibroblast growth factor 8 (androgen-induced) (FGF8), transcript variant B                                                                        | -473 |
| FGFR1_E317_F        | Y | fibroblast growth factor receptor 1 (fms-related tyrosine kinase 2, Pfeiffer syndrome) (FGFR1), transcript variant 1                              | 317  |
| FGFR2_P266_R        | Y | fibroblast growth factor receptor 2 (bacteria-expressed kinase, keratinocyte growth factor receptor, craniofacial dysostosis 1, Crouzon syndrome, | -266 |
| FGFR3_E297_R        | Y | fibroblast growth factor receptor 3 (achondroplasia, thanatophoric dwarfism) (FGFR3), transcript variant 2                                        | 297  |
| FHIT_E19_R          | Y | fragile histidine triad gene (FHIT)                                                                                                               | 19   |
| FHIT_P93_R          | Y | fragile histidine triad gene (FHIT)                                                                                                               | -93  |
| FLI1_E29_F          | Y | Friend leukemia virus integration 1 (FLI1)                                                                                                        | 29   |
| FLT1_E444_F         | Y | fms-related tyrosine kinase 1 (vascular endothelial growth factor/vascular permeability factor receptor) (FLT1)                                   | 444  |
| FLT1_P302_F         | Y | fms-related tyrosine kinase 1 (vascular endothelial growth factor/vascular permeability factor receptor) (FLT1)                                   | -302 |
| FLT1_P615_R         | Y | fms-related tyrosine kinase 1 (vascular endothelial growth factor/vascular permeability factor receptor) (FLT1)                                   | -615 |
| FLT3_E326_R         | Y | fms-related tyrosine kinase 3 (FLT3)                                                                                                              | 326  |
| FLT3_P302_F         | Y | fms-related tyrosine kinase 3 (FLT3)                                                                                                              | -302 |
| FLT4_E206_F         | Y | fms-related tyrosine kinase 4 (FLT4), transcript variant 2                                                                                        | 206  |
| FLT4_P180_R         | Y | fms-related tyrosine kinase 4 (FLT4), transcript variant 2                                                                                        | -180 |
| FN1_E469_F          | Y | fibronectin 1 (FN1), transcript variant 7                                                                                                         | 469  |
| FN1_P229_R          | Y | fibronectin 1 (FN1), transcript variant 7                                                                                                         | -229 |
| FZD7_E296_F         | Y | frizzled homolog 7 (Drosophila) (FZD7)                                                                                                            | 296  |
| FZD9_P15_R          | Y | frizzled homolog 9 (Drosophila) (FZD9)                                                                                                            | -15  |
| FZD9_P175_F         | Y | frizzled homolog 9 (Drosophila) (FZD9)                                                                                                            | -175 |
| GALR1_E52_F         | Y | galanin receptor 1 (GALR1)                                                                                                                        | 52   |
| GAS1_E22_F          | Y | growth arrest-specific 1 (GAS1)                                                                                                                   | 22   |
| GAS1_P754_R         | Y | growth arrest-specific 1 (GAS1)                                                                                                                   | -754 |
| GAS7_E148_F         | Y | growth arrest-specific 7 (GAS7), transcript variant a                                                                                             | 148  |
| GATA6_P21_R         | Y | GATA binding protein 6 (GATA6)                                                                                                                    | -21  |
| GATA6_P726_F        | Y | GATA binding protein 6 (GATA6)                                                                                                                    | -726 |
| GFI1_P45_R          | Y | growth factor independent 1 (GFI1)                                                                                                                | -45  |
| GJB2_E43_F          | Y | gap junction protein, beta 2, 26kDa (connexin 26) (GJB2)                                                                                          | 43   |
| GJB2_P791_R         | Y | gap junction protein, beta 2, 26kDa (connexin 26) (GJB2)                                                                                          | -791 |
| GNMT_E126_F         | Y | glycine N-methyltransferase (GNMT)                                                                                                                | 126  |
| GPX3_E178_F         | Y | glutathione peroxidase 3 (plasma) (GPX3)                                                                                                          | 178  |
| GRB10_E85_R         | Y | growth factor receptor-bound protein 10 (GRB10), transcript variant 4                                                                             | 85   |
| GRB10_P260_F        | Y | growth factor receptor-bound protein 10 (GRB10), transcript variant 4                                                                             | -260 |
| GSTP1_P74_F         | Y | glutathione S-transferase pi (GSTP1)                                                                                                              | -74  |
| GSTP1_seq_38_S153_R | Y | glutathione S-transferase pi (GSTP1)                                                                                                              | -48  |
| GUCY2D_E419_R       | Y | guanylate cyclase 2D, membrane (retina-specific) (GUCY2D)                                                                                         | 419  |
| HBEGF_P32_R         | Y | heparin-binding EGF-like growth factor (HBEGF)                                                                                                    | -32  |
| HCK_P46_R           | Y | hemopoietic cell kinase (HCK)                                                                                                                     | -46  |
| HDAC11_P556_F       | Y | histone deacetylase 11 (HDAC11)                                                                                                                   | -556 |
| HFE_E273_R          | Y | hemochromatosis (HFE), transcript variant 10                                                                                                      | 273  |

## Supplementary Table 3 (cont.)

|                 |   |                                                                                                                       |       |
|-----------------|---|-----------------------------------------------------------------------------------------------------------------------|-------|
| HHIP_E94_F      | Y | hedgehog interacting protein (HHIP)                                                                                   | 323   |
| HIC2_P498_F     | Y | hypermethylated in cancer 2 (HIC2)                                                                                    | -498  |
| HIC2_P528_R     | Y | hypermethylated in cancer 2 (HIC2)                                                                                    | -528  |
| HIF1A_P488_F    | Y | hypoxia-inducible factor 1, alpha subunit (basic helix-loop-helix transcription factor) (HIF1A), transcript variant 1 | -488  |
| HLA-F_E402_F    | Y | major histocompatibility complex, class I, F (HLA-F)                                                                  | 402   |
| HLF_E192_F      | Y | hepatic leukemia factor (HLF)                                                                                         | 192   |
| HOXA11_E35_F    | Y | homeo box A11 (HOXA11)                                                                                                | 35    |
| HOXA11_P92_R    | Y | homeo box A11 (HOXA11)                                                                                                | -92   |
| HOXB13_E21_F    | Y | homeo box B13 (HOXB13)                                                                                                | 21    |
| HOXB13_P17_R    | Y | homeo box B13 (HOXB13)                                                                                                | -17   |
| HPSE_P29_F      | Y | heparanase (HPSE)                                                                                                     | -29   |
| HPSE_P93_F      | Y | heparanase (HPSE)                                                                                                     | -93   |
| HRASLS_E72_R    | Y | HRAS-like suppressor (HRASLS)                                                                                         | 72    |
| HSD17B12_E145_R | Y | hydroxysteroid (17-beta) dehydrogenase 12 (HSD17B12)                                                                  | 145   |
| HSD17B12_P97_F  | Y | hydroxysteroid (17-beta) dehydrogenase 12 (HSD17B12)                                                                  | -97   |
| HTR2A_P853_F    | N | 5-hydroxytryptamine (serotonin) receptor 2A (HTR2A)                                                                   | -853  |
| ICA1_P72_R      | Y | islet cell autoantigen 1, 69kDa (ICA1), transcript variant 2                                                          | -72   |
| ICAM1_E242_F    | Y | intercellular adhesion molecule 1 (CD54), human rhinovirus receptor (ICAM1)                                           | 242   |
| ICAM1_P119_R    | Y | intercellular adhesion molecule 1 (CD54), human rhinovirus receptor (ICAM1)                                           | -119  |
| ID1_P659_R      | Y | inhibitor of DNA binding 1, dominant negative helix-loop-helix protein (ID1), transcript variant 1                    | -659  |
| ID1_P880_F      | Y | inhibitor of DNA binding 1, dominant negative helix-loop-helix protein (ID1), transcript variant 1                    | -880  |
| IFNGR1_P307_F   | Y | interferon gamma receptor 1 (IFNGR1)                                                                                  | -307  |
| IFNGR2_E164_F   | Y | interferon gamma receptor 2 (interferon gamma transducer 1) (IFNGR2)                                                  | 164   |
| IGF1R_E186_R    | Y | insulin-like growth factor 1 receptor (IGF1R)                                                                         | 186   |
| IGF1R_P325_R    | Y | insulin-like growth factor 1 receptor (IGF1R)                                                                         | -325  |
| IGF2_P1036_R    | Y | insulin-like growth factor 2 (somatomedin A) (IGF2)                                                                   | -709  |
| IGFBP3_E65_R    | Y | insulin-like growth factor binding protein 3 (IGFBP3), transcript variant 2                                           | 65    |
| IGFBP3_P1035_F  | Y | insulin-like growth factor binding protein 3 (IGFBP3), transcript variant 2                                           | -1035 |
| IGFBP6_P328_R   | Y | insulin-like growth factor binding protein 6 (IGFBP6)                                                                 | -328  |
| IGFBP7_P371_F   | Y | insulin-like growth factor binding protein 7 (IGFBP7)                                                                 | -371  |
| IGSF4_P454_F    | Y | immunoglobulin superfamily, member 4 (IGSF4)                                                                          | -454  |
| IGSF4C_P533_R   | Y | immunoglobulin superfamily, member 4C (IGSF4C)                                                                        | -533  |
| IHH_E186_F      | Y | Indian hedgehog homolog (Drosophila) (IHH)                                                                            | 186   |
| IHH_P246_R      | Y | Indian hedgehog homolog (Drosophila) (IHH)                                                                            | -246  |
| IHH_P529_F      | Y | Indian hedgehog homolog (Drosophila) (IHH)                                                                            | -529  |
| IL11_P11_R      | Y | interleukin 11 (IL11)                                                                                                 | -11   |
| IL12A_E287_R    | Y | interleukin 12A (natural killer cell stimulatory factor 1, cytotoxic lymphocyte maturation factor 1, p35) (IL12A)     | 287   |
| IL17RB_P788_R   | Y | interleukin 17 receptor B (IL17RB), transcript variant 1                                                              | 392   |
| IMPACT_P234_R   | Y | Impact homolog (mouse) (IMPACT)                                                                                       | -234  |
| INHA_P1144_R    | Y | inhibin, alpha (INHA)                                                                                                 | .     |
| INHA_P1189_F    | Y | inhibin, alpha (INHA)                                                                                                 | .     |
| INSR_P1063_R    | Y | insulin receptor (INSR)                                                                                               | -1063 |

## Supplementary Table 3 (cont.)

|                 |   |                                                                                                                               |       |
|-----------------|---|-------------------------------------------------------------------------------------------------------------------------------|-------|
| IRAK3_E130_F    | Y | interleukin-1 receptor-associated kinase 3 (IRAK3)                                                                            | 130   |
| IRAK3_P13_F     | Y | interleukin-1 receptor-associated kinase 3 (IRAK3)                                                                            | -13   |
| IRF5_P123_F     | Y | interferon regulatory factor 5 (IRF5), transcript variant 2                                                                   | -123  |
| IRF7_P277_R     | Y | interferon regulatory factor 7 (IRF7), transcript variant b                                                                   | -277  |
| ISL1_E87_R      | Y | ISL1 transcription factor, LIM/homeodomain, (islet-1) (ISL1)                                                                  | 132   |
| ISL1_P554_F     | Y | ISL1 transcription factor, LIM/homeodomain, (islet-1) (ISL1)                                                                  | -554  |
| ITGA2_E120_F    | Y | integrin, alpha 2 (CD49B, alpha 2 subunit of VLA-2 receptor) (ITGA2)                                                          | 120   |
| ITGA2_P26_R     | Y | integrin, alpha 2 (CD49B, alpha 2 subunit of VLA-2 receptor) (ITGA2)                                                          | -26   |
| ITGA6_P298_R    | Y | integrin, alpha 6 (ITGA6)                                                                                                     | -298  |
| ITGB1_P451_F    | Y | integrin, beta 1 (fibronectin receptor, beta polypeptide, antigen CD29 includes MDF2, MSK12) (ITGB1), transcript variant 1C-1 | -451  |
| ITGB4_E144_F    | Y | integrin, beta 4 (ITGB4), transcript variant 1                                                                                | 144   |
| ITPR2_P804_F    | Y | inositol 1,4,5-triphosphate receptor, type 2 (ITPR2)                                                                          | -804  |
| ITPR3_E86_R     | Y | inositol 1,4,5-triphosphate receptor, type 3 (ITPR3)                                                                          | 86    |
| JAG1_P66_F      | Y | jagged 1 (Alagille syndrome) (JAG1)                                                                                           | -66   |
| JAG2_E54_F      | Y | jagged 2 (JAG2), transcript variant 2                                                                                         | 54    |
| JAG2_P264_F     | Y | jagged 2 (JAG2), transcript variant 2                                                                                         | -264  |
| JAK2_P772_R     | Y | Janus kinase 2 (a protein tyrosine kinase) (JAK2)                                                                             | -772  |
| JUNB_P1149_R    | Y | jun B proto-oncogene (JUNB)                                                                                                   | -1149 |
| KCNQ1_E349_R    | Y | potassium voltage-gated channel, KQT-like subfamily, member 1 (KCNQ1), transcript variant 3                                   | 349   |
| KIAA1804_P689_R | Y | mixed lineage kinase 4 (KIAA1804)                                                                                             | -689  |
| KIT_P367_R      | Y | v-kit Hardy-Zuckerman 4 feline sarcoma viral oncogene homolog (KIT)                                                           | -367  |
| KIT_P405_F      | Y | v-kit Hardy-Zuckerman 4 feline sarcoma viral oncogene homolog (KIT)                                                           | -405  |
| KLF5_E190_R     | Y | Kruppel-like factor 5 (intestinal) (KLF5)                                                                                     | 190   |
| KLF5_P13_F      | Y | Kruppel-like factor 5 (intestinal) (KLF5)                                                                                     | -13   |
| L1CAM_P148_R    | Y | L1 cell adhesion molecule (L1CAM), transcript variant 2                                                                       | -148  |
| LAMB1_E144_R    | Y | laminin, beta 1 (LAMB1)                                                                                                       | 144   |
| LAMC1_E466_R    | Y | laminin, gamma 1 (formerly LAMB2) (LAMC1)                                                                                     | 466   |
| LAMC1_P808_F    | Y | laminin, gamma 1 (formerly LAMB2) (LAMC1)                                                                                     | -808  |
| LIF_E208_F      | Y | leukemia inhibitory factor (cholinergic differentiation factor) (LIF)                                                         | 208   |
| LIG4_P194_F     | Y | ligase IV, DNA, ATP-dependent (LIG4), transcript variant 1                                                                    | -194  |
| LMO1_P169_F     | Y | LIM domain only 1 (rhombotin 1) (LMO1)                                                                                        | -169  |
| LOX_P71_F       | Y | lysyl oxidase (LOX)                                                                                                           | -71   |
| LRP2_E20_F      | Y | low density lipoprotein-related protein 2 (LRP2)                                                                              | 20    |
| LRRC32_P865_R   | Y | leucine rich repeat containing 32 (LRRC32)                                                                                    | -865  |
| LYN_P241_F      | Y | v-yes-1 Yamaguchi sarcoma viral related oncogene homolog (LYN)                                                                | -241  |
| MAF_E77_R       | Y | v-maf musculoaponeurotic fibrosarcoma oncogene homolog (avian) (MAF), transcript variant 1                                    | 77    |
| MAF_P826_R      | Y | v-maf musculoaponeurotic fibrosarcoma oncogene homolog (avian) (MAF), transcript variant 1                                    | -826  |
| MAP2K6_E297_F   | N | mitogen-activated protein kinase kinase 6 (MAP2K6), transcript variant 1                                                      | 297   |
| MAPK12_E165_R   | Y | mitogen-activated protein kinase 12 (MAPK12)                                                                                  | 165   |
| MAPK12_P416_F   | Y | mitogen-activated protein kinase 12 (MAPK12)                                                                                  | -416  |
| MATK_P64_F      | Y | megakaryocyte-associated tyrosine kinase (MATK), transcript variant 1                                                         | -64   |
| MCAM_P169_R     | Y | melanoma cell adhesion molecule (MCAM)                                                                                        | -169  |

## Supplementary Table 3 (cont.)

|                    |   |                                                                                                                |       |
|--------------------|---|----------------------------------------------------------------------------------------------------------------|-------|
| MCAM_P265_R        | Y | melanoma cell adhesion molecule (MCAM)                                                                         | -265  |
| MCC_E23_R          | Y | mutated in colorectal cancers (MCC)                                                                            | 23    |
| MCC_P196_R         | Y | mutated in colorectal cancers (MCC)                                                                            | -196  |
| MCM2_P241_R        | Y | MCM2 minichromosome maintenance deficient 2, mitotin ( <i>S. cerevisiae</i> ) (MCM2)                           | -241  |
| MCM2_P260_F        | Y | MCM2 minichromosome maintenance deficient 2, mitotin ( <i>S. cerevisiae</i> ) (MCM2)                           | -260  |
| MDR1_seq_42_S300_R | Y | ATP-binding cassette, sub-family B (MDR/TAP), member 1 (ABCB1)                                                 | .     |
| MDS1_E45_F         | Y | myelodysplasia syndrome 1 (MDS1)                                                                               | 45    |
| MGMT_P272_R        | Y | O-6-methylguanine-DNA methyltransferase (MGMT)                                                                 | -272  |
| MGMT_P281_F        | Y | O-6-methylguanine-DNA methyltransferase (MGMT)                                                                 | -281  |
| MLF1_P97_F         | Y | myeloid leukemia factor 1 (MLF1)                                                                               | -97   |
| MLH1_P381_F        | Y | mutL homolog 1, colon cancer, nonpolyposis type 2 ( <i>E. coli</i> ) (MLH1)                                    | 197   |
| MLH3_E72_F         | Y | mutL homolog 3 ( <i>E. coli</i> ) (MLH3)                                                                       | 72    |
| MLH3_P25_F         | Y | mutL homolog 3 ( <i>E. coli</i> ) (MLH3)                                                                       | -25   |
| MLLT3_E93_R        | Y | myeloid/lymphoid or mixed-lineage leukemia (trithorax homolog, <i>Drosophila</i> ); translocated to, 3 (MLLT3) | 93    |
| MLLT4_P1400_F      | Y | myeloid/lymphoid or mixed-lineage leukemia (trithorax homolog, <i>Drosophila</i> ); translocated to, 4 (MLLT4) | -1400 |
| MLLT6_P957_F       | Y | myeloid/lymphoid or mixed-lineage leukemia (trithorax homolog, <i>Drosophila</i> ); translocated to, 6 (MLLT6) | -957  |
| MMP2_E21_R         | Y | matrix metalloproteinase 2 (gelatinase A, 72kDa gelatinase, 72kDa type IV collagenase) (MMP2)                  | 21    |
| MMP9_P237_R        | N | matrix metalloproteinase 9 (gelatinase B, 92kDa gelatinase, 92kDa type IV collagenase) (MMP9)                  | -237  |
| MT1A_P49_R         | Y | metallothionein 1A (functional) (MT1A)                                                                         | -49   |
| MTA1_P478_F        | Y | metastasis associated 1 (MTA1)                                                                                 | -478  |
| MXI1_P75_R         | Y | MAX interactor 1 (MXI1), transcript variant 1                                                                  | -75   |
| MYB_P673_R         | Y | v-myb myeloblastosis viral oncogene homolog (avian) (MYB)                                                      | -673  |
| MYBL2_P211_F       | Y | v-myb myeloblastosis viral oncogene homolog (avian)-like 2 (MYBL2)                                             | -211  |
| MYBL2_P354_F       | Y | v-myb myeloblastosis viral oncogene homolog (avian)-like 2 (MYBL2)                                             | -354  |
| MYCL1_P502_R       | Y | v-myc myelocytomatosis viral oncogene homolog 1, lung carcinoma derived (avian) (MYCL1), transcript variant 1  | -502  |
| MYCN_E77_R         | Y | v-myc myelocytomatosis viral related oncogene, neuroblastoma derived (avian) (MYCN)                            | 77    |
| MYCN_P464_R        | Y | v-myc myelocytomatosis viral related oncogene, neuroblastoma derived (avian) (MYCN)                            | -464  |
| MYH11_P236_R       | Y | myosin, heavy polypeptide 11, smooth muscle (MYH11), transcript variant SM2                                    | -236  |
| MYLK_E132_R        | Y | myosin, light polypeptide kinase (MYLK), transcript variant 1                                                  | 132   |
| NCL_P840_R         | Y | nucleolin (NCL)                                                                                                | -840  |
| NEO1_P1067_F       | Y | neogenin homolog 1 (chicken) (NEO1)                                                                            | -1067 |
| NFKB2_P709_R       | Y | nuclear factor of kappa light polypeptide gene enhancer in B-cells 2 (p49/p100) (NFKB2)                        | -709  |
| NGFB_E353_F        | Y | nerve growth factor, beta polypeptide (NGFB)                                                                   | 353   |
| NGFR_E328_F        | Y | nerve growth factor receptor (TNFR superfamily, member 16) (NGFR)                                              | 328   |
| NKX3-1_P146_F      | Y | NK3 transcription factor related, locus 1 ( <i>Drosophila</i> ) (NKX3-1)                                       | -146  |
| NOTCH1_E452_R      | Y | Notch homolog 1, translocation-associated ( <i>Drosophila</i> ) (NOTCH1)                                       | 452   |
| NOTCH1_P1198_F     | Y | Notch homolog 1, translocation-associated ( <i>Drosophila</i> ) (NOTCH1)                                       | -1198 |
| NPY_P91_F          | Y | neuropeptide Y (NPY)                                                                                           | -91   |
| NQO1_E74_R         | Y | NAD(P)H dehydrogenase, quinone 1 (NQO1), transcript variant 3                                                  | 74    |
| NQO1_P345_R        | N | NAD(P)H dehydrogenase, quinone 1 (NQO1), transcript variant 3                                                  | -345  |
| NR2F6_E375_R       | Y | nuclear receptor subfamily 2, group F, member 6 (NR2F6)                                                        | 375   |
| NRAS_P103_R        | Y | neuroblastoma RAS viral (v-ras) oncogene homolog (NRAS)                                                        | -103  |

Supplementary Table 3 (cont.)

|                |   |                                                                                                                                             |       |
|----------------|---|---------------------------------------------------------------------------------------------------------------------------------------------|-------|
| NRG1_E74_F     | Y | neuregulin 1 (NRG1), transcript variant HRG-beta3                                                                                           | 74    |
| NTRK2_P10_F    | Y | neurotrophic tyrosine kinase, receptor, type 2 (NTRK2), transcript variant e                                                                | -271  |
| NTRK2_P395_R   | Y | neurotrophic tyrosine kinase, receptor, type 2 (NTRK2), transcript variant e                                                                | -656  |
| NTRK3_E131_F   | Y | neurotrophic tyrosine kinase, receptor, type 3 (NTRK3), transcript variant 2                                                                | 131   |
| NTSR1_E109_F   | Y | neurotensin receptor 1 (high affinity) (NTSR1)                                                                                              | 109   |
| OAT_P465_F     | Y | ornithine aminotransferase (gyrate atrophy) (OAT), nuclear gene encoding mitochondrial protein                                              | -465  |
| ODC1_P424_F    | Y | ornithine decarboxylase 1 (ODC1)                                                                                                            | -424  |
| ONECUT2_E96_F  | Y | one cut domain, family member 2 (ONECUT2)                                                                                                   | 96    |
| P2RX7_E323_R   | Y | purinergic receptor P2X, ligand-gated ion channel, 7 (P2RX7), transcript variant 2                                                          | 323   |
| PAX6_E129_F    | Y | paired box gene 6 (aniridia, keratitis) (PAX6), transcript variant 2                                                                        | 129   |
| PAX6_P1121_F   | Y | paired box gene 6 (aniridia, keratitis) (PAX6), transcript variant 2                                                                        | -1121 |
| PAX6_P50_R     | Y | paired box gene 6 (aniridia, keratitis) (PAX6), transcript variant 2                                                                        | -50   |
| PCDH1_E22_F    | Y | protocadherin 1 (cadherin-like 1) (PCDH1), transcript variant 2                                                                             | 22    |
| PCGF4_P760_R   | Y | polycomb group ring finger 4 (PCGF4)                                                                                                        | -760  |
| PCGF4_P92_R    | Y | polycomb group ring finger 4 (PCGF4)                                                                                                        | -92   |
| PDE1B_E141_F   | Y | phosphodiesterase 1B, calmodulin-dependent (PDE1B)                                                                                          | 141   |
| PDE1B_P263_R   | Y | phosphodiesterase 1B, calmodulin-dependent (PDE1B)                                                                                          | -263  |
| PDGFA_P841_R   | Y | PREDICTED: platelet-derived growth factor alpha polypeptide, transcript variant 1 (PDGFA)                                                   | -841  |
| PDGFRA_P1429_F | Y | platelet-derived growth factor receptor, alpha polypeptide (PDGFRA)                                                                         | -1429 |
| PGF_E33_F      | Y | placental growth factor, vascular endothelial growth factor-related protein (PGF)                                                           | 33    |
| PHLDA2_E159_R  | Y | pleckstrin homology-like domain, family A, member 2 (PHLDA2)                                                                                | 159   |
| PKD2_P287_R    | Y | polycystic kidney disease 2 (autosomal dominant) (PKD2)                                                                                     | -287  |
| PKD2_P336_R    | Y | polycystic kidney disease 2 (autosomal dominant) (PKD2)                                                                                     | -336  |
| PLAU_P11_F     | Y | plasminogen activator, urokinase (PLAU)                                                                                                     | -11   |
| PLAU_P176_R    | Y | plasminogen activator, urokinase (PLAU)                                                                                                     | -176  |
| PLAUR_E123_F   | Y | plasminogen activator, urokinase receptor (PLAUR), transcript variant 3                                                                     | 123   |
| PLAUR_P82_F    | Y | plasminogen activator, urokinase receptor (PLAUR), transcript variant 3                                                                     | -82   |
| PLXDC1_E71_F   | Y | plexin domain containing 1 (PLXDC1)                                                                                                         | 71    |
| PLXDC1_P236_F  | Y | plexin domain containing 1 (PLXDC1)                                                                                                         | -236  |
| PLXDC2_E337_F  | Y | plexin domain containing 2 (PLXDC2)                                                                                                         | 337   |
| PODXL_P1341_R  | Y | podocalyxin-like (PODXL), transcript variant 1                                                                                              | -1341 |
| POMC_E254_F    | Y | proopiomelanocortin (adrenocorticotropin/ beta-lipotropin/ alpha-melanocyte stimulating hormone/ beta-melanocyte stimulating hormone/ beta- | 254   |
| POMC_P53_F     | Y | proopiomelanocortin (adrenocorticotropin/ beta-lipotropin/ alpha-melanocyte stimulating hormone/ beta-melanocyte stimulating hormone/ beta- | -53   |
| PPARG_E178_R   | Y | peroxisome proliferative activated receptor, gamma (PPARG), transcript variant 4                                                            | 178   |
| PPP2R1B_P268_R | Y | protein phosphatase 2 (formerly 2A), regulatory subunit A (PR 65), beta isoform (PPP2R1B), transcript variant 2                             | -268  |
| PRKAR1A_P337_R | Y | protein kinase, cAMP-dependent, regulatory, type I, alpha (tissue specific extinguisher 1) (PRKAR1A), transcript variant 3                  | -337  |
| PROK2_E0_F     | Y | prokineticin 2 (PROK2)                                                                                                                      | 0     |
| PROK2_P390_F   | Y | prokineticin 2 (PROK2)                                                                                                                      | -390  |
| PTCH_E42_F     | Y | patched homolog (Drosophila) (PTCH)                                                                                                         | 42    |
| PTCH2_P37_F    | Y | patched homolog 2 (Drosophila) (PTCH2)                                                                                                      | -37   |
| PTEN_P438_F    | Y | phosphatase and tensin homolog (mutated in multiple advanced cancers 1) (PTEN)                                                              | -438  |
| PTGS1_E80_F    | Y | prostaglandin-endoperoxide synthase 1 (prostaglandin G/H synthase and cyclooxygenase) (PTGS1), transcript variant 1                         | 80    |

Supplementary Table 3 (cont.)

|                   |   |                                                                                                                                       |      |
|-------------------|---|---------------------------------------------------------------------------------------------------------------------------------------|------|
| PTGS1_P2_F        | Y | prostaglandin-endoperoxide synthase 1 (prostaglandin G/H synthase and cyclooxygenase) (PTGS1), transcript variant 1                   | -2   |
| PTGS2_P524_R      | Y | prostaglandin-endoperoxide synthase 2 (prostaglandin G/H synthase and cyclooxygenase) (PTGS2)                                         | -524 |
| PTK2_P735_R       | Y | PTK2 protein tyrosine kinase 2 (PTK2), transcript variant 2                                                                           | -735 |
| PTK2B_P673_R      | Y | PTK2B protein tyrosine kinase 2 beta (PTK2B), transcript variant 4                                                                    | .    |
| PTPNS1_E433_R     | Y | protein tyrosine phosphatase, non-receptor type substrate 1 (PTPNS1)                                                                  | 433  |
| PTPNS1_P301_R     | Y | protein tyrosine phosphatase, non-receptor type substrate 1 (PTPNS1)                                                                  | -301 |
| PTPRF_E178_R      | Y | protein tyrosine phosphatase, receptor type, F (PTPRF), transcript variant 1                                                          | 178  |
| PTPRG_E40_R       | Y | protein tyrosine phosphatase, receptor type, G (PTPRG)                                                                                | 40   |
| PTPRG_P476_F      | Y | protein tyrosine phosphatase, receptor type, G (PTPRG)                                                                                | -476 |
| PTPRO_E56_F       | Y | protein tyrosine phosphatase, receptor type, O (PTPRO), transcript variant 2                                                          | 56   |
| PURA_P928_R       | Y | purine-rich element binding protein A (PURA)                                                                                          | -928 |
| PYCARD_E87_F      | Y | PYD and CARD domain containing (PYCARD), transcript variant 2                                                                         | 87   |
| RAB32_E314_R      | Y | RAB32, member RAS oncogene family (RAB32)                                                                                             | 314  |
| RAF1_P330_F       | Y | v-raf-1 murine leukemia viral oncogene homolog 1 (RAF1)                                                                               | -330 |
| RARB_P60_F        | Y | retinoic acid receptor, beta (RARB), transcript variant 2                                                                             | -60  |
| RARRES1_E235_F    | Y | retinoic acid receptor responder (tazarotene induced) 1 (RARRES1), transcript variant 1                                               | 235  |
| RASGRF1_P768_F    | Y | Ras protein-specific guanine nucleotide-releasing factor 1 (RASGRF1), transcript variant 1                                            | -768 |
| RBL2_P250_R       | Y | retinoblastoma-like 2 (p130) (RBL2)                                                                                                   | -250 |
| RBP1_E158_F       | Y | retinol binding protein 1, cellular (RBP1)                                                                                            | 158  |
| RET_P717_F        | N | ret proto-oncogene (multiple endocrine neoplasia and medullary thyroid carcinoma 1, Hirschsprung disease) (RET), transcript variant 4 | -717 |
| RET_seq_53_S374_F | Y | ret proto-oncogene (multiple endocrine neoplasia and medullary thyroid carcinoma 1, Hirschsprung disease) (RET), transcript variant 4 | -446 |
| RET_seq_54_S260_F | Y | ret proto-oncogene (multiple endocrine neoplasia and medullary thyroid carcinoma 1, Hirschsprung disease) (RET), transcript variant 4 | 11   |
| RHOC_P536_F       | Y | ras homolog gene family, member C (RHOC)                                                                                              | -536 |
| RIPK2_E123_F      | Y | receptor-interacting serine-threonine kinase 2 (RIPK2)                                                                                | 123  |
| RIPK4_E166_F      | Y | receptor-interacting serine-threonine kinase 4 (RIPK4)                                                                                | 166  |
| RIPK4_P172_F      | Y | receptor-interacting serine-threonine kinase 4 (RIPK4)                                                                                | -172 |
| ROR1_P6_F         | Y | receptor tyrosine kinase-like orphan receptor 1 (ROR1)                                                                                | -6   |
| ROR2_E112_F       | Y | receptor tyrosine kinase-like orphan receptor 2 (ROR2)                                                                                | 112  |
| ROR2_P317_R       | Y | receptor tyrosine kinase-like orphan receptor 2 (ROR2)                                                                                | -317 |
| RYK_P493_F        | Y | PREDICTED: RYK receptor-like tyrosine kinase (RYK)                                                                                    | -493 |
| SEMA3B_P110_R     | N | sema domain, immunoglobulin domain (Ig), short basic domain, secreted, (semaphorin) 3B (SEMA3B), transcript variant 1                 | -110 |
| SEMA3F_P692_R     | Y | sema domain, immunoglobulin domain (Ig), short basic domain, secreted, (semaphorin) 3F (SEMA3F)                                       | -692 |
| SEZ6L_P249_F      | Y | seizure related 6 homolog (mouse)-like (SEZ6L)                                                                                        | -249 |
| SEZ6L_P299_F      | Y | seizure related 6 homolog (mouse)-like (SEZ6L)                                                                                        | -299 |
| SGCE_E149_F       | Y | sarcoglycan, epsilon (SGCE)                                                                                                           | -359 |
| SHB_P473_R        | Y | Src homology 2 domain containing adaptor protein B (SHB)                                                                              | -473 |
| SHH_P104_R        | Y | sonic hedgehog homolog (Drosophila) (SHH)                                                                                             | -104 |
| SKI_E465_R        | Y | v-ski sarcoma viral oncogene homolog (avian) (SKI)                                                                                    | 465  |
| SMAD4_P474_R      | Y | SMAD, mothers against DPP homolog 4 (Drosophila) (SMAD4)                                                                              | -474 |
| SMARCA3_E20_F     | Y | SWI/SNF related, matrix associated, actin dependent regulator of chromatin, subfamily a, member 3 (SMARCA3), transcript variant 2     | 20   |
| SMARCA3_P109_R    | Y | SWI/SNF related, matrix associated, actin dependent regulator of chromatin, subfamily a, member 3 (SMARCA3), transcript variant 2     | -109 |
| SMARCA4_P362_R    | Y | SWI/SNF related, matrix associated, actin dependent regulator of chromatin, subfamily a, member 4 (SMARCA4)                           | -362 |

## Supplementary Table 3 (cont.)

|                   |   |                                                                                                           |       |
|-------------------|---|-----------------------------------------------------------------------------------------------------------|-------|
| SMO_E57_F         | Y | smoothened homolog (Drosophila) (SMO)                                                                     | 57    |
| SMO_P455_R        | Y | smoothened homolog (Drosophila) (SMO)                                                                     | -455  |
| SOX1_P1018_R      | Y | SRY (sex determining region Y)-box 1 (SOX1)                                                               | -1018 |
| SYK_E372_F        | Y | spleen tyrosine kinase (SYK)                                                                              | 372   |
| TAL1_E122_F       | Y | T-cell acute lymphocytic leukemia 1 (TAL1)                                                                | 122   |
| TCF7L2_E411_F     | Y | transcription factor 7-like 2 (T-cell specific, HMG-box) (TCF7L2)                                         | 411   |
| TCF7L2_P193_R     | Y | transcription factor 7-like 2 (T-cell specific, HMG-box) (TCF7L2)                                         | -193  |
| TERT_E20_F        | Y | telomerase reverse transcriptase (TERT), transcript variant 2                                             | 20    |
| TES_E172_F        | Y | testis derived transcript (3 LIM domains) (TES), transcript variant 1                                     | 172   |
| TES_P182_F        | Y | testis derived transcript (3 LIM domains) (TES), transcript variant 1                                     | -182  |
| TESK2_P252_R      | Y | testis-specific kinase 2 (TESK2)                                                                          | -252  |
| TFAP2C_E260_F     | Y | transcription factor AP-2 gamma (activating enhancer binding protein 2 gamma) (TFAP2C)                    | 260   |
| TFPI2_E141_F      | Y | tissue factor pathway inhibitor 2 (TFPI2)                                                                 | 141   |
| TGFA_P558_F       | Y | transforming growth factor, alpha (TGFA)                                                                  | -558  |
| TGFA_P642_R       | Y | transforming growth factor, alpha (TGFA)                                                                  | -642  |
| TGFB2_P632_F      | Y | transforming growth factor, beta 2 (TGFB2)                                                                | -632  |
| TGFBI_P31_R       | Y | transforming growth factor, beta-induced, 68kDa (TGFBI)                                                   | -31   |
| TGFBR3_E188_R     | Y | transforming growth factor, beta receptor III (betaglycan, 300kDa) (TGFBR3)                               | 188   |
| TGFBR3_P429_F     | Y | transforming growth factor, beta receptor III (betaglycan, 300kDa) (TGFBR3)                               | -429  |
| THBS1_E207_R      | Y | thrombospondin 1 (THBS1)                                                                                  | 207   |
| THBS1_P500_F      | Y | thrombospondin 1 (THBS1)                                                                                  | -500  |
| THBS2_E129_F      | Y | thrombospondin 2 (THBS2)                                                                                  | 129   |
| TIAM1_P188_R      | Y | T-cell lymphoma invasion and metastasis 1 (TIAM1)                                                         | -188  |
| TIMP2_E394_R      | Y | PREDICTED: TIMP metalloproteinase inhibitor 2 (TIMP2)                                                     | 394   |
| TIMP3_seq_7_S38_F | Y | TIMP metalloproteinase inhibitor 3 (Sorsby fundus dystrophy, pseudoinflammatory) (TIMP3)                  | .     |
| TJP1_P326_R       | Y | tight junction protein 1 (zona occludens 1) (TJP1), transcript variant 2                                  | -326  |
| TJP1_P390_F       | Y | tight junction protein 1 (zona occludens 1) (TJP1), transcript variant 2                                  | -390  |
| TK1_P62_R         | Y | thymidine kinase 1, soluble (TK1)                                                                         | -62   |
| TMEFF1_E180_R     | Y | transmembrane protein with EGF-like and two follistatin-like domains 1 (TMEFF1)                           | 180   |
| TMEFF1_P234_F     | Y | transmembrane protein with EGF-like and two follistatin-like domains 1 (TMEFF1)                           | -234  |
| TMEFF2_E94_R      | Y | transmembrane protein with EGF-like and two follistatin-like domains 2 (TMEFF2)                           | 94    |
| TMEM63A_E63_F     | Y | transmembrane protein 63A (TMEM63A)                                                                       | 63    |
| TNC_P57_F         | Y | tenascin C (hexabrachion) (TNC)                                                                           | -57   |
| TNFRSF10A_P171_F  | Y | tumor necrosis factor receptor superfamily, member 10a (TNFRSF10A)                                        | 70    |
| TNFRSF10A_P91_F   | Y | tumor necrosis factor receptor superfamily, member 10a (TNFRSF10A)                                        | -10   |
| TNFRSF10B_E198_R  | Y | tumor necrosis factor receptor superfamily, member 10b (TNFRSF10B), transcript variant 2                  | 198   |
| TNFRSF10B_P108_R  | Y | tumor necrosis factor receptor superfamily, member 10b (TNFRSF10B), transcript variant 2                  | -108  |
| TNFRSF10C_E109_F  | Y | tumor necrosis factor receptor superfamily, member 10c, decoy without an intracellular domain (TNFRSF10C) | 109   |
| TNFRSF10D_E27_F   | Y | tumor necrosis factor receptor superfamily, member 10d, decoy with truncated death domain (TNFRSF10D)     | 27    |
| TNFRSF1B_E5_F     | Y | tumor necrosis factor receptor superfamily, member 1B (TNFRSF1B)                                          | 5     |
| TNFRSF1B_P167_F   | Y | tumor necrosis factor receptor superfamily, member 1B (TNFRSF1B)                                          | -167  |
| TP73_E155_F       | Y | tumor protein p73 (TP73)                                                                                  | 155   |

Supplementary Table 3 (cont.)

|                   |   |                                                                                                 |       |
|-------------------|---|-------------------------------------------------------------------------------------------------|-------|
| TP73_P496_F       | Y | tumor protein p73 (TP73)                                                                        | -496  |
| TPEF_seq_44_S36_F | Y | transmembrane protein with EGF-like and two follistatin-like domains 2 (TMEFF2)                 | 442   |
| TRAF4_P372_F      | Y | TNF receptor-associated factor 4 (TRAF4), transcript variant 2                                  | -372  |
| TRIP6_E33_F       | Y | thyroid hormone receptor interactor 6 (TRIP6)                                                   | 33    |
| TSG101_P139_R     | Y | tumor susceptibility gene 101 (TSG101)                                                          | -139  |
| TSG101_P257_R     | Y | tumor susceptibility gene 101 (TSG101)                                                          | -257  |
| TUBB3_P364_F      | Y | tubulin, beta 3 (TUBB3)                                                                         | -364  |
| TUBB3_P721_R      | Y | tubulin, beta 3 (TUBB3)                                                                         | -721  |
| TWIST1_E117_R     | Y | twist homolog 1 (acrocephalosyndactyly 3; Saethre-Chotzen syndrome) (Drosophila) (TWIST1)       | 117   |
| TYK2_P494_F       | Y | tyrosine kinase 2 (TYK2)                                                                        | -494  |
| TYRO3_P501_F      | N | TYRO3 protein tyrosine kinase (TYRO3)                                                           | -501  |
| UBA52_P293_R      | Y | ubiquitin A-52 residue ribosomal protein fusion product 1 (UBA52)                               | -293  |
| UNG_P170_F        | Y | uracil-DNA glycosylase (UNG), nuclear gene encoding mitochondrial protein, transcript variant 1 | -170  |
| VAV2_E58_F        | Y | vav 2 oncogene (VAV2)                                                                           | 58    |
| VAV2_P1182_F      | Y | vav 2 oncogene (VAV2)                                                                           | -1182 |
| VEGFB_P658_F      | Y | PREDICTED: vascular endothelial growth factor B (VEGFB)                                         | -658  |
| VIM_P343_R        | Y | vimentin (VIM)                                                                                  | -343  |
| VIM_P811_R        | Y | vimentin (VIM)                                                                                  | -811  |
| WNT1_E157_F       | Y | wingless-type MMTV integration site family, member 1 (WNT1)                                     | 157   |
| WNT2_P217_F       | Y | wingless-type MMTV integration site family member 2 (WNT2)                                      | -217  |
| WNT2B_P1185_R     | Y | wingless-type MMTV integration site family, member 2B (WNT2B), transcript variant WNT-2B2       | -1185 |
| WNT5A_E43_F       | Y | wingless-type MMTV integration site family, member 5A (WNT5A)                                   | 43    |
| WNT5A_P655_F      | Y | wingless-type MMTV integration site family, member 5A (WNT5A)                                   | -655  |
| YES1_P216_F       | Y | v-yes-1 Yamaguchi sarcoma viral oncogene homolog 1 (YES1)                                       | -216  |
| YES1_P600_F       | Y | v-yes-1 Yamaguchi sarcoma viral oncogene homolog 1 (YES1)                                       | -600  |
| ZMYND10_E77_R     | Y | zinc finger, MYND-type containing 10 (ZMYND10)                                                  | 77    |
| ZNF264_E48_R      | Y | zinc finger protein 264 (ZNF264)                                                                | 48    |
| ZP3_E90_F         | Y | PREDICTED: zona pellucida glycoprotein 3 (sperm receptor) (ZP3)                                 | 90    |

---



Supplementary Table 4 (cont.)

| Bladder (n: 116)   | Blood (n: 155) | Bone marrow (n: 136) | Brain (n: 221) | Buccal epithelium (n: 119) | Colon (n: 80)  | Esophagus (n: 106) | Liver (n: 109)     | Muscle (n: 183) | Pancreas (n: 144) | Prostate (n: 175) | Skin (n: 195)       | Stomach (n: 76) |
|--------------------|----------------|----------------------|----------------|----------------------------|----------------|--------------------|--------------------|-----------------|-------------------|-------------------|---------------------|-----------------|
| AIM2_E208_F        | CSF2_E248_R    | DNAJC15_P65_F        | CLDN4_P1120_R  | P13_E107_F                 | APOC1_P406_R   | ACTG2_P346_F       | EMR3_P39_R         | TRPM5_P979_F    | MPL_P62_F         | MPL_P62_F         | HOXB2_P488_R        |                 |
| NOS3_P38_F         | S100A2_P1186_F | S100A2_P1186_F       | S100A2_P1186_F | IL1RN_E42_F                | DNAJC15_P65_F  | CSF3R_P8_F         | NBL1_P24_F         | RUNX3_P247_F    | IL2_P607_R        | IL2_P607_R        | IL2_P607_R          |                 |
| IL1RN_E42_F        | SEPT9_P58_R    | SEPT9_P58_R          | SEPT9_P58_R    | DDR2_P743_R                | DDR2_P743_R    | MSH2_P1008_F       | MEST_P4_F          | KRT13_P341_R    | GLI2_P99_F        | GLI2_P99_F        | IL1B_P582_R         |                 |
| CYP2E1_E53_R       | NA12_P11_F     | NA12_P11_F           | NA12_P11_F     | MSH2_P1008_F               | MSH2_P1008_F   | CD2_P68_F          | AATK_P519_R        | SOD3_P460_R     | CCKAR_E79_F       | CCKAR_E79_F       | MMP9_P189_F         |                 |
| MSSK1_seq_27_S45_F | MCF2_E195_F    | MCF2_E195_F          | MCF2_E195_F    | PTPRH_E173_F               | PTPRH_E173_F   | ASB4_E89_F         | NOS3_P38_F         | NOSS3_P39_R     | EMR3_P39_R        | EMR3_P39_R        | EPHX1_P1358_R       |                 |
| EGF_E339_F         | UGT1A1_P315_R  | UGT1A1_P315_R        | UGT1A1_P315_R  | PLA2G2A_P528_F             | PLA2G2A_P528_F | CD86_P3_F          | IFNG_P186_F        | IFNG_P186_F     | CD86_P3_F         | CD86_P3_F         | ASB4_P52_R          |                 |
| EMR3_P39_R         | SP11_P929_F    | SP11_P929_F          | SP11_P929_F    | CEACAM1_P44_R              | CEACAM1_P44_R  | LTB4R_E64_R        | EV12A_P94_R        | PADI4_E24_F     | KRT13_P676_F      | KRT13_P676_F      | CD34_P339_R         |                 |
| ZIM3_P718_R        | AATK_P709_R    | AATK_P709_R          | AATK_P709_R    | RIPK1_P868_F               | RIPK1_P868_F   | BLK_P14_F          | SP11_P929_F        | CD34_P339_R     | ITK_P114_F        | ITK_P114_F        | TRPM5_P979_F        |                 |
| CREBBP_P712_R      | DNMT2_P199_F   | DNMT2_P199_F         | DNMT2_P199_F   | TF2_P178_F                 | TF2_P178_F     | LAT_E46_F          | S100A4_P194_R      | PTHLH_E251_F    | DSG1_P159_R       | DSG1_P159_R       | CCKAR_P270_F        |                 |
| MPL_P62_F          | CREBBP_P712_R  | CREBBP_P712_R        | CREBBP_P712_R  | FGF1_P357_R                | FGF1_P357_R    | SRC_E100_R         | MSSK1_seq_27_S45_F | TM7SF3_P1068_R  | RIPK1_P744_R      | RIPK1_P744_R      | GUCY2F_P255_F       |                 |
| UGT1A1_P315_R      | NBL1_E205_R    | NBL1_E205_R          | NBL1_E205_R    | VAMP8_P241_F               | VAMP8_P241_F   | MMP9_P189_F        | CD34_P339_R        | IL1RN_E42_F     | CDH17_E31_F       | CDH17_E31_F       | EPHX1_P1358_R       |                 |
| MUSK_P308_F        | MMP3_P55_F     | MMP3_P55_F           | MMP3_P55_F     | S100A2_P1186_F             | S100A2_P1186_F | GUCY2F_P255_F      | DNMT2_P199_F       | TDG_E129_F      | LIMK1_P709_R      | LIMK1_P709_R      | RIPK1_P868_F        |                 |
| EV12A_P94_R        | HOXA5_P479_F   | HOXA5_P479_F         | HOXA5_P479_F   | PRSS1_E45_R                | PRSS1_E45_R    | ITK_P114_F         | DMP1_P134_F        | PIK3R1_P307_F   | IL2_P607_R        | IL2_P607_R        | SOD3_P460_R         |                 |
| APOA1_P261_F       | CSF1R_P73_F    | CSF1R_P73_F          | CSF1R_P73_F    | ASB4_P391_F                | ASB4_P391_F    | MMP3_P55_F         | S100A2_P1186_F     | PTPRH_E173_F    | PTHLH_P757_F      | PTHLH_P757_F      | KRT1_P798_R         |                 |
| ACVR1_P983_F       | CCKAR_P270_F   | CCKAR_P270_F         | CCKAR_P270_F   | MMP3_P55_F                 | MMP3_P55_F     | KRT13_P676_F       | AIM2_P624_F        | PSCA_P135_F     | EGF_E339_F        | EGF_E339_F        | HTR2A_E10_R         |                 |
| HOXB2_P488_R       | MAGEC3_E307_F  | MAGEC3_E307_F        | MAGEC3_E307_F  | GUCY2F_P255_F              | GUCY2F_P255_F  | SLC6A8_P409_F      | MUSK_P308_F        | SLC14A1_E295_F  | SLC6A8_P193_R     | SLC6A8_P193_R     | ACVR1_P983_F        |                 |
| AIM2_P624_F        | DNJA15_P65_F   | DNJA15_P65_F         | DNJA15_P65_F   | EPHX1_P1358_R              | EPHX1_P1358_R  | NOTCH4_P938_F      | TNFSF8_E258_R      | PLG_P370_F      | IFNG_P188_F       | IFNG_P188_F       | PLA2G2A_P528_F      |                 |
| PTHLH_P757_F       | MUSK_P308_F    | MUSK_P308_F          | MUSK_P308_F    | CCKAR_P270_F               | CCKAR_P270_F   | UGT1A1_P315_R      | TIMP1_P615_R       | KRT13_P676_F    | EV12A_P94_R       | EV12A_P94_R       | ITK_P114_F          |                 |
| TNFRSF1A_P678_F    | RIPK1_P868_F   | RIPK1_P868_F         | RIPK1_P868_F   | PLA2G2A_E268_F             | PLA2G2A_E268_F | IFNG_E293_F        | EV12A_E20_F        | CARD15_P665_F   | S100A4_P194_R     | S100A4_P194_R     | TGDR_E129_F         |                 |
| WEE1_P924_R        | PRSS1_E45_R    | PRSS1_E45_R          | PRSS1_E45_R    | XRCC1_P681_R               | XRCC1_P681_R   | TDG_E129_F         | STAT5A_P704_R      | AIM2_E208_F     | IL1B_P582_R       | IL1B_P582_R       | CREBBP_P712_R       |                 |
| CHI3L2_P226_F      | NOS3_P38_F     | NOS3_P38_F           | NOS3_P38_F     | IFNG_P459_R                | IFNG_P459_R    | NPR2_P1093_F       | S1C14A1_E295_F     | BMPR1A_E88_F    | MMP19_E274_R      | MMP19_E274_R      | IFNG_P188_F         |                 |
| EPHX1_P22_F        | IL1B_P582_R    | IL1B_P582_R          | IL1B_P582_R    | CCL3_E53_R                 | CCL3_E53_R     | CCL3_E53_R         | CD86_P3_F          | MEST_P62_R      | MPO_E302_R        | MPO_E302_R        | CYP2E1_P416_F       |                 |
| CCKAR_E79_F        | NBL1_P24_F     | NBL1_P24_F           | NBL1_P24_F     | CD34_P339_R                | CD34_P339_R    | CD34_P339_R        | TGFb3_E58_R        | XRCC1_P681_R    | CD2_P68_F         | CD2_P68_F         | PTPRH_E173_F        |                 |
| TM7SF3_P1068_R     | CYP2E1_E53_R   | CYP2E1_E53_R         | CYP2E1_E53_R   | CSF3R_P472_F               | CSF3R_P472_F   | CSF3R_P472_F       | MMP3_P55_F         | PLA2G2A_E268_F  | FOF1_E5_F         | FOF1_E5_F         | PLA2G2A_P528_F      |                 |
| LTB4R_E64_R        | IL2_P607_R     | IL2_P607_R           | IL2_P607_R     | P13_E107_F                 | P13_E107_F     | P13_E107_F         | SEPT9_P374_F       | CEACAM1_P44_R   | AIM2_P624_F       | AIM2_P624_F       | AIM2_E208_F         |                 |
| HLA-DOB_E432_R     | NPR2_P1093_F   | NPR2_P1093_F         | NPR2_P1093_F   | PIK3R1_P307_F              | PIK3R1_P307_F  | PIK3R1_P307_F      | IL10_P85_F         | MAPK10_E28_F    | IFNG_P459_R       | IFNG_P459_R       | RIPK1_P744_R        |                 |
| SLC14A1_E295_F     | APBA2_P227_F   | APBA2_P227_F         | APBA2_P227_F   | C4B_P191_F                 | C4B_P191_F     | C4B_P191_F         | ACVR1_P983_F       | APOC1_P406_R    | TIE1_E66_R        | TIE1_E66_R        | NOS3_P38_F          |                 |
| ASB4_E89_F         | GUCY2F_P255_F  | GUCY2F_P255_F        | GUCY2F_P255_F  | DLCL1_P895_F               | DLCL1_P895_F   | DLCL1_P895_F       | NID1_P714_R        | MAPK10_E28_F    | LTA_P214_R        | LTA_P214_R        | DES_P1006_R         |                 |
| PRSS8_E134_R       | CLDN4_P1120_R  | CLDN4_P1120_R        | CLDN4_P1120_R  | TFNFS8_P182_F              | TFNFS8_P182_F  | TFNFS8_P182_F      | ACVR1_P983_F       | APOC1_P406_R    | BLK_P14_F         | BLK_P14_F         | CSF3R_P472_F        |                 |
| SOD3_P460_R        | FRK_P36_F      | FRK_P36_F            | FRK_P36_F      | TEK_P526_F                 | TEK_P526_F     | TEK_P526_F         | SLC22A3_P634_F     | NID1_P714_R     | SLC6A8_P409_F     | SLC6A8_P409_F     | CSF3R_P472_F        |                 |
| KRT1_P798_R        | IL12B_P1453_F  | IL12B_P1453_F        | IL12B_P1453_F  | DLCL1_P88_R                | DLCL1_P88_R    | DLCL1_P88_R        | SLC22A3_P634_F     | MAPK10_E28_F    | PADI4_E24_F       | PADI4_E24_F       | HPN_P823_F          |                 |
| ITK_P114_F         | TIMP1_P615_R   | TIMP1_P615_R         | TIMP1_P615_R   | RIPK1_P868_F               | RIPK1_P868_F   | RIPK1_P868_F       | SLC22A3_P634_F     | ACVR1_P983_F    | PECAM1_P135_F     | PECAM1_P135_F     | BLK_P14_F           |                 |
| SP11_P929_F        | PIK3R1_P307_F  | PIK3R1_P307_F        | PIK3R1_P307_F  | ZAP70_P220_R               | ZAP70_P220_R   | ZAP70_P220_R       | SLC22A3_P634_F     | SLC22A3_P634_F  | SP11_P48_F        | SP11_P48_F        | HIC-1_seq_48_S103_R |                 |
| TIMP1_P615_R       | IFNG_P188_F    | IFNG_P188_F          | IFNG_P188_F    | SPP1_P647_F                | SPP1_P647_F    | SPP1_P647_F        | SLC22A3_P634_F     | SLC22A3_P634_F  | LIMK1_P709_R      | LIMK1_P709_R      | HIC-1_seq_48_S103_R |                 |
| IL1B_P582_R        | MMP19_P306_F   | MMP19_P306_F         | MMP19_P306_F   | IFNG_P188_F                | IFNG_P188_F    | IFNG_P188_F        | SLC22A3_P634_F     | SLC22A3_P634_F  | S100A12_P1221_R   | S100A12_P1221_R   | DNMT2_P199_F        |                 |
|                    | APBA2_P305_R   | APBA2_P305_R         | APBA2_P305_R   | IFNG_P188_F                | IFNG_P188_F    | IFNG_P188_F        | SLC22A3_P634_F     | SLC22A3_P634_F  | SEPT9_P374_F      | SEPT9_P374_F      | SERPINA5_E69_F      |                 |
|                    | DSG1_E292_F    | DSG1_E292_F          | DSG1_E292_F    | IFNG_P188_F                | IFNG_P188_F    | IFNG_P188_F        | SLC22A3_P634_F     | SLC22A3_P634_F  | CTGF_P693_R       | CTGF_P693_R       | APBA2_P305_R        |                 |
|                    | EPHX1_P1358_R  | EPHX1_P1358_R        | EPHX1_P1358_R  | IFNG_P188_F                | IFNG_P188_F    | IFNG_P188_F        | SLC22A3_P634_F     | SLC22A3_P634_F  | TDG_E129_F        | TDG_E129_F        | SNURF_E78_F         |                 |
|                    | DMP1_P134_F    | DMP1_P134_F          | DMP1_P134_F    | IFNG_P188_F                | IFNG_P188_F    | IFNG_P188_F        | SLC22A3_P634_F     | SLC22A3_P634_F  | SLC22A18_P216_R   | SLC22A18_P216_R   | MAPK4_E273_F        |                 |
|                    | HOXB2_P488_R   | HOXB2_P488_R         | HOXB2_P488_R   | IFNG_P188_F                | IFNG_P188_F    | IFNG_P188_F        | SLC22A3_P634_F     | SLC22A3_P634_F  | CD2_P68_F         | CD2_P68_F         | TF2_P178_F          |                 |
|                    | DSG1_P159_R    | DSG1_P159_R          | DSG1_P159_R    | IFNG_P188_F                | IFNG_P188_F    | IFNG_P188_F        | SLC22A3_P634_F     | SLC22A3_P634_F  | TRPM5_E87_F       | TRPM5_E87_F       | BLK_P14_F           |                 |
|                    | HLA-DOA2_E93_F | HLA-DOA2_E93_F       | HLA-DOA2_E93_F | IFNG_P188_F                | IFNG_P188_F    | IFNG_P188_F        | SLC22A3_P634_F     | SLC22A3_P634_F  | TRIM29_P135_F     | TRIM29_P135_F     | SNURF_P78_F         |                 |
|                    | HLA-DOA_P594_F | HLA-DOA_P594_F       | HLA-DOA_P594_F | IFNG_P188_F                | IFNG_P188_F    | IFNG_P188_F        | SLC22A3_P634_F     | SLC22A3_P634_F  | OSM_P34_F         | OSM_P34_F         | MMP3_P55_F          |                 |
|                    | ACVR1_E328_R   | ACVR1_E328_R         | ACVR1_E328_R   | IFNG_P188_F                | IFNG_P188_F    | IFNG_P188_F        | SLC22A3_P634_F     | SLC22A3_P634_F  | GRP1B_E278_R      | GRP1B_E278_R      | PSCA_P135_F         |                 |
|                    | SNGC_E119_F    | SNGC_E119_F          | SNGC_E119_F    | IFNG_P188_F                | IFNG_P188_F    | IFNG_P188_F        | SLC22A3_P634_F     | SLC22A3_P634_F  | IFNG_E293_F       | IFNG_E293_F       | AIM2_E208_F         |                 |
|                    | HLA-DOB_E432_R | HLA-DOB_E432_R       | HLA-DOB_E432_R | IFNG_P188_F                | IFNG_P188_F    | IFNG_P188_F        | SLC22A3_P634_F     | SLC22A3_P634_F  | IL10_P85_F        | IL10_P85_F        | AIM2_E208_F         |                 |
|                    | TDG_E129_F     | TDG_E129_F           | TDG_E129_F     | IFNG_P188_F                | IFNG_P188_F    | IFNG_P188_F        | SLC22A3_P634_F     | SLC22A3_P634_F  | NOS2A_E117_R      | NOS2A_E117_R      | SNFN_E118_F         |                 |
|                    | EGF_P413_F     | EGF_P413_F           | EGF_P413_F     | IFNG_P188_F                | IFNG_P188_F    | IFNG_P188_F        | SLC22A3_P634_F     | SLC22A3_P634_F  | FOF1_E5_F         | FOF1_E5_F         | SFN_E118_F          |                 |
|                    | C4B_E171_F     | C4B_E171_F           | C4B_E171_F     | IFNG_P188_F                | IFNG_P188_F    | IFNG_P188_F        | SLC22A3_P634_F     | SLC22A3_P634_F  | S100A4_P194_R     | S100A4_P194_R     | PRSS1_E45_R         |                 |
|                    | NOS2A_P288_R   | NOS2A_P288_R         | NOS2A_P288_R   | IFNG_P188_F                | IFNG_P188_F    | IFNG_P188_F        | SLC22A3_P634_F     | SLC22A3_P634_F  | OSM_P186_F        | OSM_P186_F        | BMPR1A_E88_F        |                 |
|                    | AGXT_P180_F    | AGXT_P180_F          | AGXT_P180_F    | IFNG_P188_F                | IFNG_P188_F    | IFNG_P188_F        | SLC22A3_P634_F     | SLC22A3_P634_F  | MAPK4_E273_F      | MAPK4_E273_F      | GLI2_E90_F          |                 |
|                    | IFNG_P459_R    | IFNG_P459_R          | IFNG_P459_R    | IFNG_P188_F                | IFNG_P188_F    | IFNG_P188_F        | SLC22A3_P634_F     | SLC22A3_P634_F  | MUSK_P308_F       | MUSK_P308_F       | TDG_E129_F          |                 |
|                    | GRPR_P200_R    | GRPR_P200_R          | GRPR_P200_R    | IFNG_P188_F                | IFNG_P188_F    | IFNG_P188_F        | SLC22A3_P634_F     | SLC22A3_P634_F  | SLC14A1_E295_F    | SLC14A1_E295_F    | MMP19_E274_R        |                 |
|                    | ITK_P114_F     | ITK_P114_F           | ITK_P114_F     | IFNG_P188_F                | IFNG_P188_F    | IFNG_P188_F        | SLC22A3_P634_F     | SLC22A3_P634_F  | CD86_P3_F         | CD86_P3_F         | PTHLH_E251_F        |                 |
|                    | GFAP_P56_R     | GFAP_P56_R           | GFAP_P56_R     | IFNG_P188_F                | IFNG_P188_F    | IFNG_P188_F        | SLC22A3_P634_F     | SLC22A3_P634_F  | CD86_P3_F         | CD86_P3_F         | TF2_P178_F          |                 |
|                    | P13_P274_R     | P13_P274_R           | P13_P274_R     | IFNG_P188_F                | IFNG_P188_F    | IFNG_P188_F        | SLC22A3_P634_F     | SLC22A3_P634_F  | CCKAR_P270_F      | CCKAR_P270_F      | IL1B_P582_R         |                 |
|                    | KRT1_P798_R    | KRT1_P798_R          | KRT1_P798_R    | IFNG_P188_F                | IFNG_P188_F    | IFNG_P188_F        | SLC22A3_P634_F     | SLC22A3_P634_F  | S100A2_P1186_F    | S100A2_P1186_F    | IL1B_P582_R         |                 |
|                    | TMPRSS4_P552_F | TMPRSS4_P552_F       | TMPRSS4_P552_F | IFNG_P188_F                | IFNG_P188_F    | IFNG_P188_F        | SLC22A3_P634_F     | SLC22A3_P634_F  | TRIP6_P1090_F     | TRIP6_P1090_F     | IL12B_P1453_F       |                 |
|                    | KRT5_P308_F    | KRT5_P308_F          | KRT5_P308_F    | IFNG_P188_F                | IFNG_P188_F    | IFNG_P188_F        | SLC22A3_P634_F     | SLC22A3_P634_F  | ASB4_P391_F       | ASB4_P391_F       | HLA-DOA2_E93_F      |                 |
|                    | DDR1_P332_R    | DDR1_P332_R          | DDR1_P332_R    | IFNG_P188_F                | IFNG_P188_F    | IFNG_P188_F        | SLC22A3_P634_F     | SLC22A3_P634_F  | EPHB1_E202_R      | EPHB1_E202_R      | GF11_P208_R         |                 |
|                    | LCN2_P141_R    | LCN2_P141_R          | LCN2_P141_R    | IFNG_P188_F                | IFNG_P188_F    | IFNG_P188_F        | SLC22A3_P634_F     | SLC22A3_P634_F  | LAT_E46_F         | LAT_E46_F         | SP11_P929_F         |                 |
|                    | KLK1_P103_R    | KLK1_P103_R          | KLK1_P103_R    | IFNG_P188_F                | IFNG_P188_F    | IFNG_P188_F        | SLC22A3_P634_F     | SLC22A3_P634_F  | GPATC3_P410_R     | GPATC3_P410_R     | CARD15_P665_F       |                 |
|                    | RUNX3_P393_R   | RUNX3_P393_R         | RUNX3_P393_R   | IFNG_P188_F                | IFNG_P188_F    | IFNG_P188_F        | SLC22A3_P634_F     | SLC22A3_P634_F  | LTB4R_E64_R       | LTB4R_E64_R       | HLA-DOA_P594_F      |                 |
|                    | BLK_P14_F      | BLK_P14_F            | BLK_P14_F      | IFNG_P188_F                | IFNG_P188_F    | IFNG_P188_F        | SLC22A3_P634_F     | SLC22A3_P634_F  | THBS2_P605_R      | THBS2_P605_R      | HPN_P823_F          |                 |
|                    | APOC1_P406_R   | APOC1_P406_R         | APOC1_P406_R   | IFNG_P188_F                | IFNG_P188_F    | IFNG_P188_F        | SLC22A3_P634_F     | SLC22A3_P634_F  | PDGFR4_E125_F     | PDGFR4_E125_F     | EMR3_P39_R          |                 |
|                    | LIG3_P622_R    | LIG3_P622_R          | LIG3_P622_R    | IFNG_P188_F                | IFNG_P188_F    | IFNG_P188_F        | SLC22A3_P634_F     | SLC22A3_P634_F  | SLC22A3_P634_F    | SLC22A3_P634_F    | AIM2_E208_F         |                 |
|                    | SLC14A1_E295_F | SLC14A1_E295_F       | SLC14A1_E295_F | IFNG_P188_F                | IFNG_P188_F    | IFNG_P188_F        | SLC22A3_P634_F     | SLC22A3_P634_F  | SLC22A3_P634_F    | SLC22A3_P634_F    | AIM2_E208_F         |                 |
|                    | IFNG_E293_F    | IFNG_E293_F          | IFNG_E293_F    | IFNG_P188_F                | IFNG_P188_F    | IFNG_P188_F        | SLC22A3_P634_F     | SLC22A3_P634_F  | SLC22A3_P634_F    | SLC22A3_P634_F    | AIM2_E208_F         |                 |
|                    | RARA_P1076_R   | RARA_P1076_R         | RARA_P1076_R   | IFNG_P188_F                | IFNG_P188_F    | IFNG_P188_F        | SLC22A3_P634_F     | SLC22A3_P634_F  | SLC22A3_P634_F    | SLC22A3_P634_F    | AIM2_E208_F         |                 |



**Supplementary Table 5.** List of CpG sites with significant age-dependent methylation in blood. CpG island associated (CGI): Yes (Y) or not (N).

| CpG site (n= 48 )   | CGI | Gene Symbol | + Correlation | p-Value  | CpG site (n= 30 ) | CGI | Gene Symbol | - Correlation | p-Value  |
|---------------------|-----|-------------|---------------|----------|-------------------|-----|-------------|---------------|----------|
| ESR1_P151_R         | Y   | ESR1        | 0.62          | 4.30E-15 | IL16_P93_R        | N   | IL16        | -0.81         | 3.61E-34 |
| PENK_E26_F          | Y   | PENK        | 0.61          | 3.53E-14 | CARD15_P302_R     | N   | CARD15      | -0.77         | 9.66E-29 |
| BMP4_P199_R         | Y   | BMP4        | 0.61          | 4.39E-14 | NFKB1_P496_F      | Y   | NFKB1       | -0.76         | 6.49E-28 |
| IL17RB_E164_R       | Y   | IL17RB      | 0.60          | 9.11E-14 | HLA-DPA1_E35_R    | N   | HLA-DPA1    | -0.71         | 2.78E-22 |
| NRG1_E74_F          | Y   | NRG1        | 0.60          | 1.64E-13 | SPP1_P647_F       | N   | SPP1        | -0.71         | 4.71E-22 |
| MFAP4_P10_R         | N   | MFAP4       | 0.59          | 5.40E-13 | AIM2_P624_F       | N   | AIM2        | -0.71         | 6.52E-22 |
| FZD9_E458_F         | Y   | FZD9        | 0.59          | 5.86E-13 | CD82_P557_R       | Y   | CD82        | -0.68         | 1.35E-19 |
| PALM2-AKAP2_P420_R  | Y   | PALM2-AKAP2 | 0.59          | 7.62E-13 | PXN_P308_F        | Y   | PXN         | -0.66         | 3.32E-18 |
| FGF2_P229_F         | Y   | FGF2        | 0.59          | 1.03E-12 | TRIP6_P1274_R     | Y   | TRIP6       | -0.66         | 1.15E-17 |
| NEFL_P209_R         | Y   | NEFL        | 0.59          | 1.11E-12 | HLA-DPA1_P205_R   | N   | HLA-DPA1    | -0.65         | 2.50E-17 |
| DBC1_P351_R         | Y   | DBC1        | 0.58          | 1.46E-12 | HLA-DPA1_P28_R    | N   | HLA-DPA1    | -0.64         | 1.97E-16 |
| MYOD1_E156_F        | Y   | MYOD1       | 0.58          | 2.17E-12 | ACVR1_E328_R      | N   | ACVR1       | -0.64         | 2.34E-16 |
| TUSC3_E29_R         | Y   | TUSC3       | 0.58          | 4.05E-12 | EV12A_E420_F      | N   | EV12A       | -0.62         | 1.00E-14 |
| IPF1_P234_F         | Y   | IPF1        | 0.57          | 6.18E-12 | TJP2_P518_F       | Y   | TJP2        | -0.59         | 3.80E-13 |
| COL1A2_P48_R        | Y   | COL1A2      | 0.57          | 6.48E-12 | ERCC1_P440_R      | Y   | ERCC1       | -0.59         | 5.86E-13 |
| PITX2_E24_R         | Y   | PITX2       | 0.57          | 8.77E-12 | BCR_P422_F        | Y   | BCR         | -0.57         | 1.12E-11 |
| DBC1_E204_F         | Y   | DBC1        | 0.57          | 9.85E-12 | BCR_P346_F        | Y   | BCR         | -0.56         | 2.11E-11 |
| SLIT2_P208_F        | Y   | SLIT2       | 0.56          | 1.88E-11 | CLK1_P538_F       | N   | CLK1        | -0.56         | 2.33E-11 |
| EYA4_P794_F         | Y   | EYA4        | 0.56          | 2.12E-11 | SOD3_P225_F       | N   | SOD3        | -0.56         | 3.97E-11 |
| CDH11_P203_R        | Y   | CDH11       | 0.56          | 3.07E-11 | TRIP6_P1090_F     | Y   | TRIP6       | -0.55         | 1.32E-10 |
| CDH13_P88_F         | Y   | CDH13       | 0.56          | 4.62E-11 | IL8_E118_R        | N   | IL8         | -0.54         | 2.81E-10 |
| FAT_P279_R          | Y   | FAT         | 0.55          | 1.19E-10 | JAK3_P1075_R      | N   | JAK3        | -0.54         | 3.03E-10 |
| RAB32_P493_R        | Y   | RAB32       | 0.55          | 2.02E-10 | CSF1R_E26_F       | N   | CSF1R       | -0.54         | 3.40E-10 |
| ALOX12_E85_R        | Y   | ALOX12      | 0.54          | 2.37E-10 | KLK11_P103_R      | N   | KLK11       | -0.54         | 4.36E-10 |
| FRZB_E186_R         | Y   | FRZB        | 0.54          | 2.40E-10 | MPL_P62_F         | N   | MPL         | -0.53         | 1.09E-09 |
| FGF3_P171_R         | Y   | FGF3        | 0.54          | 4.10E-10 | FAS_P322_R        | N   | FAS         | -0.53         | 1.24E-09 |
| TJP1_P326_R         | Y   | TJP1        | 0.54          | 4.85E-10 | MPL_P657_F        | N   | MPL         | -0.53         | 2.13E-09 |
| IGFBP3_P1035_F      | Y   | IGFBP3      | 0.54          | 4.91E-10 | LTB4R_P163_F      | N   | LTB4R       | -0.50         | 2.37E-08 |
| DIO3_P674_F         | Y   | DIO3        | 0.53          | 7.34E-10 | CTSD_P726_F       | Y   | CTSD        | -0.50         | 2.83E-08 |
| HS3ST2_E145_R       | Y   | HS3ST2      | 0.53          | 7.99E-10 | PADI4_E24_F       | N   | PADI4       | -0.50         | 3.08E-08 |
| KDR_P445_R          | Y   | KDR         | 0.53          | 8.69E-10 |                   |     |             |               |          |
| ASCL2_P609_R        | Y   | ASCL2       | 0.53          | 9.49E-10 |                   |     |             |               |          |
| HIC-1_seq_48_S103_R | Y   | HIC1        | 0.53          | 1.04E-09 |                   |     |             |               |          |
| MT1A_P49_R          | Y   | MT1A        | 0.53          | 2.16E-09 |                   |     |             |               |          |
| HTR1B_P222_F        | Y   | HTR1B       | 0.52          | 2.49E-09 |                   |     |             |               |          |
| PALM2-AKAP2_P183_R  | Y   | PALM2-AKAP2 | 0.52          | 2.55E-09 |                   |     |             |               |          |
| FAT_P973_R          | Y   | FAT         | 0.52          | 3.21E-09 |                   |     |             |               |          |
| HOXA11_E35_F        | Y   | HOXA11      | 0.52          | 3.82E-09 |                   |     |             |               |          |
| DES_E228_R          | Y   | DES         | 0.52          | 4.99E-09 |                   |     |             |               |          |
| PTPRG_P476_F        | Y   | PTPRG       | 0.52          | 5.25E-09 |                   |     |             |               |          |
| LOX_P71_F           | Y   | LOX         | 0.52          | 6.76E-09 |                   |     |             |               |          |
| MOS_E60_R           | Y   | MOS         | 0.51          | 9.81E-09 |                   |     |             |               |          |
| IGFBP3_P423_R       | Y   | IGFBP3      | 0.51          | 1.12E-08 |                   |     |             |               |          |
| PTGS2_P308_F        | Y   | PTGS2       | 0.51          | 1.37E-08 |                   |     |             |               |          |
| ZMYND10_P329_F      | Y   | ZMYND10     | 0.51          | 1.46E-08 |                   |     |             |               |          |
| ISL1_E87_R          | Y   | ISL1        | 0.51          | 1.84E-08 |                   |     |             |               |          |
| ISL1_P379_F         | Y   | ISL1        | 0.50          | 2.47E-08 |                   |     |             |               |          |
| MME_E29_F           | Y   | MME         | 0.50          | 3.22E-08 |                   |     |             |               |          |

**Supplementary Table 6.** List of CpG sites unmethylated in differentiated material from adult and embryonic stem cells and methylated in the corresponding primary tissues. CpG island associated (CGI): Yes (Y) or not (N).

| Neuron differentiation (n:52) | CGI | Muscle differentiation (n:75) | CGI |
|-------------------------------|-----|-------------------------------|-----|
| ACVR1_P983_F                  | N   | AATK_P519_R                   | Y   |
| BMP4_P123_R                   | Y   | AATK_P709_R                   | Y   |
| BMP4_P199_R                   | Y   | AGXT_P180_F                   | N   |
| CCR5_P630_R                   | N   | ATP10A_P147_F                 | Y   |
| CD9_P585_R                    | Y   | BGN_P333_R                    | N   |
| CLDN4_P1120_R                 | N   | CCKAR_E79_F                   | N   |
| CTGF_P693_R                   | N   | CD1A_P6_F                     | N   |
| DDR1_P332_R                   | N   | CD86_P3_F                     | N   |
| EPHA2_P203_F                  | Y   | CD9_P504_F                    | Y   |
| EYA4_P794_F                   | Y   | CD9_P585_R                    | Y   |
| FGFR2_P460_R                  | Y   | CRIP1_P274_F                  | Y   |
| FGFR3_P1152_R                 | Y   | CSF1R_P73_F                   | N   |
| GF11_P208_R                   | Y   | CSF3R_P8_F                    | N   |
| GLI3_E148_R                   | N   | CTGF_P693_R                   | N   |
| GP1BB_E23_F                   | Y   | DAB2IP_E18_R                  | Y   |
| GP1BB_P278_R                  | Y   | DDR2_E331_F                   | N   |
| GRB7_P160_R                   | N   | DDR2_P743_R                   | N   |
| GSTM2_E153_F                  | Y   | DLC1_P88_R                    | N   |
| GSTM2_P109_R                  | N   | DSG1_P159_R                   | N   |
| HOXB2_P488_R                  | N   | EPHA1_P119_R                  | Y   |
| HOXB2_P99_F                   | Y   | EPHB1_E202_R                  | Y   |
| KIAA0125_E29_F                | N   | EVI2A_P94_R                   | N   |
| LIF_P383_R                    | N   | FASTK_P598_R                  | Y   |
| MMP10_E136_R                  | N   | FGF7_P44_F                    | N   |
| MMP14_P13_F                   | Y   | FOSL2_E384_R                  | Y   |
| MMP2_P303_R                   | Y   | GABRA5_P1016_F                | N   |
| MST1R_P392_F                  | Y   | GABRG3_P75_F                  | N   |
| MT1A_P600_F                   | Y   | GLI3_E148_R                   | N   |
| MUC1_P191_F                   | Y   | GRPR_P200_R                   | N   |
| NGFR_P355_F                   | Y   | GSTM1_P363_F                  | Y   |
| POMC_P400_R                   | Y   | H19_P541_F                    | Y   |
| PRKCDBP_E206_F                | Y   | HIC1_P565_R                   | Y   |
| PRKCDBP_P352_R                | Y   | IFNG_P188_F                   | N   |
| PRSS8_E134_R                  | Y   | IFNGR2_P377_R                 | Y   |
| PTHLH_E251_F                  | N   | IGSF4C_E65_F                  | Y   |
| PTHLH_P15_R                   | N   | IL12B_P1453_F                 | Y   |
| PTHLH_P757_F                  | N   | IL16_P93_R                    | N   |
| PTPN6_E171_R                  | Y   | KIAA0125_E29_F                | N   |
| PTPN6_P282_R                  | N   | KRAS_E82_F                    | Y   |
| RBP1_P426_R                   | Y   | LIF_P383_R                    | N   |
| RIPK3_P124_F                  | N   | MMP14_P13_F                   | Y   |
| RIPK3_P24_F                   | N   | MMP19_E274_R                  | N   |
| SH3BP2_E18_F                  | N   | MMP3_P55_F                    | N   |
| SHB_P691_R                    | Y   | MPO_E302_R                    | N   |
| SPP1_E140_R                   | N   | MST1R_P392_F                  | Y   |
| SPP1_P647_F                   | N   | NDN_E131_R                    | Y   |
| TDGF1_E53_R                   | Y   | NGFR_P355_F                   | Y   |
| TDGF1_P428_R                  | N   | NS2A_E117_R                   | N   |
| TGFB1_P173_F                  | Y   | NS2A_P288_R                   | N   |
| TNFRSF10D_P70_F               | Y   | NTCH4_E4_F                    | N   |
| VAMP8_E7_F                    | N   | PADI4_P1011_R                 | N   |
| VAMP8_P114_F                  | N   | PADI4_P1158_R                 | N   |
|                               |     | PDGFB_P719_F                  | N   |
|                               |     | PDGFRA_E125_F                 | N   |
|                               |     | PLA2G2A_E268_F                | N   |
|                               |     | PRKCDBP_P352_R                | Y   |
|                               |     | PROM1_P44_R                   | N   |
|                               |     | PRSS1_E45_R                   | N   |
|                               |     | PRSS8_E134_R                  | Y   |
|                               |     | PTHR1_P258_F                  | N   |
|                               |     | PTK7_E317_F                   | Y   |
|                               |     | PYCARD_P150_F                 | Y   |
|                               |     | RARA_P1076_R                  | N   |
|                               |     | RASSF1_P244_F                 | Y   |
|                               |     | RIPK1_P868_F                  | N   |
|                               |     | S100A2_E36_R                  | N   |
|                               |     | SEPT9_P58_R                   | Y   |
|                               |     | SFTPB_P689_R                  | N   |
|                               |     | SPDEF_E116_R                  | N   |
|                               |     | TBX1_P520_F                   | N   |
|                               |     | TEK_E75_F                     | N   |
|                               |     | TMPRSS4_P552_F                | N   |
|                               |     | TNFRSF10D_P70_F               | Y   |
|                               |     | WNT8B_E487_F                  | N   |
|                               |     | ZMYND10_P329_F                | Y   |



## Supplementary Table 7 (cont.)

|                    |   |                   |   |                   |   |              |   |
|--------------------|---|-------------------|---|-------------------|---|--------------|---|
| SOX17_P303_F       | Y | GRB7_E71_R        | N | ADCYAP1_P455_R    | Y | DAB2IP_E18_R | Y |
| TNKL1_P41_R        | Y | KCNK4_P171_R      | N | COL1A1_P5_F       | Y | TIAM1_P117_F | Y |
| DCC_E51_R          | Y | HTFB18_E112_R     | Y | TWIST1_P355_R     | Y | CDH11_P354_R | Y |
| NRG1_E74_F         | Y | GFAP_P56_R        | N | ATP10A_P147_F     | Y | PHX2_E24_R   | Y |
| AGTR1_P41_F        | Y | SOX1_P294_F       | Y | FRZB_E186_R       | Y | CHFR_P501_F  | Y |
| MAF_P826_R         | Y | IL1A_E113_R       | N | SMO_P455_R        | Y |              |   |
| IHH_P246_R         | Y | PTX2_E24_R        | Y | CALCA_E174_R      | Y |              |   |
| TMEFF2_P152_R      | Y | HOXAS_P479_F      | Y | HCK_P958_F        | Y |              |   |
| PRKCDP_E206_F      | Y | PAD4_P1011_R      | N | PENK_E26_F        | Y |              |   |
| IGFBP2_P306_F      | Y | PLAT_E158_F       | N | MMP2_E21_R        | Y |              |   |
| COL18A1_P365_R     | Y | ASCL1_P747_F      | Y | TIAM1_P117_F      | Y |              |   |
| TFAP2C_P765_F      | Y | HTFB18_P222_F     | Y | TSPO_P137_F       | Y |              |   |
| RAB22_E314_R       | Y | DSG1_E292_F       | N | PTCH2_P568_R      | Y |              |   |
| CCKBR_P480_F       | Y | PRSS8_E134_R      | Y | BMP3_E147_F       | Y |              |   |
| SILCSAB_P38_R      | Y | AIM2_E208_F       | N | GUCY2D_E419_R     | Y |              |   |
| FOSL2_E384_R       | Y | CSF3_P309_R       | N | ASCL2_P609_R      | Y |              |   |
| EGFR_P260_R        | Y | CH3L2_E10_F       | N | GF10_P95_R        | Y |              |   |
| EPHA7_E6_F         | Y | SOX17_P303_F      | Y | CCND2_P887_F      | Y |              |   |
| DAPK1_E46_R        | Y | RARA_P176_R       | N | GF10_E39_F        | Y |              |   |
| PTGS2_P524_R       | Y | ZIM3_P451_R       | Y | FLT3_P302_F       | Y |              |   |
| WT1_P853_F         | Y | DIO3_E230_R       | Y | IGFBP2_P297_F     | Y |              |   |
| POGFR1_P128_F      | N | DNAI1_E227_R      | Y | SILCSAB_P38_R     | Y |              |   |
| NTSR1_P318_F       | Y | ASB4_P391_F       | N | FGF5_E16_F        | Y |              |   |
| IGSF4_P454_F       | Y | SOX17_P287_R      | Y | CALCA_P75_F       | Y |              |   |
| CYP19B1_E83_R      | Y | CAPG_E228_F       | N | POMC_P53_F        | Y |              |   |
| RBP1_P426_R        | Y | CSF1A_E26_F       | N | DCC_E51_R         | Y |              |   |
| PLXDC2_E337_F      | Y | ARHGDB18_P148_R   | N | KIT_P405_F        | Y |              |   |
| WT1_E32_F          | Y | FZD9_E458_F       | Y | ZIM2_P22_F        | Y |              |   |
| PALM2-AKAP2_P183_R | Y | CYP2E1_P416_F     | N | ASCL1_P747_F      | Y |              |   |
| FZR_P839_F         | Y | THS2_P605_R       | N | TUSC3_P85_R       | Y |              |   |
| RASGEF1_E16_F      | Y | TAL1_P594_F       | Y | TMEFF1_P234_F     | Y |              |   |
| NOTCH3_P198_R      | Y | MMP14_P208_R      | N | POMC_P400_R       | Y |              |   |
| CEBPA_P706_F       | Y | SEPT9_P374_F      | Y | POMC_E254_F       | Y |              |   |
| EVH1_E47_R         | Y | FGFR4_P610_F      | N | FGF3_E198_R       | Y |              |   |
| HS3ST2_P546_F      | Y | ZP3_P220_F        | N | BDNF_E19_R        | Y |              |   |
| LOX_P313_R         | Y | IGFBP5_P91_R      | Y | EYA4_P506_F       | Y |              |   |
| DAPK1_P345_R       | Y | SEPT5_P441_F      | Y | ROR2_E112_F       | Y |              |   |
| CDH11_E102_R       | Y | SPARC_P195_F      | N | SGCE_E149_F       | Y |              |   |
| ERG_E28_F          | Y | S100A4_E315_F     | N | HCK_P46_R         | Y |              |   |
| GRB13_E85_R        | Y | PENK_P447_R       | Y | ADCYAP1_E163_R    | Y |              |   |
| GATA6_P21_R        | Y | S100A2_E36_R      | N | TPEF_seq_44_536_F | Y |              |   |
| CCNA1_E7_F         | Y | PTHR1_P258_F      | N | ADAMTS12_P250_R   | Y |              |   |
| EPHAS_P66_F        | Y | TNFRSF10C_P7_F    | Y | HOXAS_E187_F      | Y |              |   |
| HDXB3_E21_F        | Y | CD9_P504_F        | Y | NRG1_E74_F        | Y |              |   |
| NPY_E31_R          | Y | RASD5_P191_F      | Y | MCAM_P265_R       | Y |              |   |
| EPHB1_E202_R       | Y | MYH11_P22_F       | Y | ER_seq_81_560_F   | Y |              |   |
| IGFBP7_P297_F      | Y | IHH_E186_F        | Y | MT1A_P600_F       | Y |              |   |
| COL18A1_P494_R     | Y | BMP4_P199_R       | Y | GSTM1_P266_F      | Y |              |   |
| NOTCH3_E403_F      | Y | DCC_P471_R        | Y | GSTM2_P453_R      | N |              |   |
| TUSC3_P85_R        | Y | PTPRH_E173_F      | N | EPHAS_P66_F       | Y |              |   |
| MT1A_P49_R         | Y | BCR_P346_F        | Y | MFAP4_P197_F      | N |              |   |
| BMP2_E48_R         | Y | EYA4_E277_F       | Y | RET_P717_F        | Y |              |   |
| IGFBP1_E48_R       | Y | SERPINE1_P519_F   | N | HIC2_P528_R       | N |              |   |
| ERBB4_P255_F       | Y | PTK6_P50_F        | Y |                   |   |              |   |
| IGFBP2_P353_R      | Y | TNXL_P885_R       | Y |                   |   |              |   |
| CALCA_P75_F        | Y | ESR1_P151_R       | Y |                   |   |              |   |
| ADCYAP1_P455_R     | Y | CD81_P272_R       | Y |                   |   |              |   |
| PAX6_P90_R         | Y | SEMA3A_P658_R     | N |                   |   |              |   |
| IGF2A5_E4_F        | Y | TGFB_P173_F       | Y |                   |   |              |   |
| GABRB3_P92_F       | Y | HGF_E102_R        | N |                   |   |              |   |
| RIPK4_P172_F       | Y | CTSL_P264_R       | Y |                   |   |              |   |
| TWIST1_E117_R      | Y | TNK1_P221_F       | Y |                   |   |              |   |
| ALK_E183_R         | Y | NOTCH3_P198_R     | Y |                   |   |              |   |
| EPHA2_P106_R       | Y | VAMPB_P114_F      | N |                   |   |              |   |
| TBX1_P885_R        | Y | EPHA2_P340_R      | N |                   |   |              |   |
| PAX6_E129_F        | Y | BAX_E281_R        | Y |                   |   |              |   |
| RET_seq_53_5374_F  | Y | CPA4_E20_F        | N |                   |   |              |   |
| TWIST1_P355_R      | Y | CD62_P357_R       | Y |                   |   |              |   |
| GRB10_P260_F       | Y | IGFBP3_P423_R     | Y |                   |   |              |   |
| BDNF_E19_R         | Y | CTSD_P726_F       | Y |                   |   |              |   |
| CDH1_P45_F         | Y | MYO1D1_E156_F     | Y |                   |   |              |   |
| EPHAS_E158_R       | Y | SEPT5_P464_R      | Y |                   |   |              |   |
| TRNP_P1090_F       | Y | TPEF_seq_41_588_R | Y |                   |   |              |   |
| DIO3_P90_F         | Y | CPA4_P1265_R      | N |                   |   |              |   |
| OPCML_E219_R       | Y |                   |   |                   |   |              |   |
| FGF5_P238_R        | Y |                   |   |                   |   |              |   |
| HRAASL5_E72_R      | Y |                   |   |                   |   |              |   |
| ASCL1_E24_F        | Y |                   |   |                   |   |              |   |
| EPHA7_P205_R       | Y |                   |   |                   |   |              |   |
| HOXA11_E35_F       | Y |                   |   |                   |   |              |   |
| HLEF_E192_F        | Y |                   |   |                   |   |              |   |
| IRAK3_P185_F       | Y |                   |   |                   |   |              |   |
| INH4_P1189_F       | Y |                   |   |                   |   |              |   |
| PYCARD_P150_F      | Y |                   |   |                   |   |              |   |
| MT1A_P600_F        | Y |                   |   |                   |   |              |   |
| LOX_P71_F          | Y |                   |   |                   |   |              |   |
| POGFR1_P1429_F     | Y |                   |   |                   |   |              |   |
| FLT4_P180_R        | Y |                   |   |                   |   |              |   |
| GAS7_E148_F        | Y |                   |   |                   |   |              |   |
| DST_E31_F          | Y |                   |   |                   |   |              |   |
| TEK_E75_F          | N |                   |   |                   |   |              |   |
| THBS1_E207_R       | Y |                   |   |                   |   |              |   |
| ROR2_E112_F        | Y |                   |   |                   |   |              |   |
| IGFBP1_P12_R       | Y |                   |   |                   |   |              |   |
| HIC2_P498_F        | Y |                   |   |                   |   |              |   |
| MMP2_E21_R         | Y |                   |   |                   |   |              |   |
| IHH_P529_F         | Y |                   |   |                   |   |              |   |
| INH4_P1144_R       | Y |                   |   |                   |   |              |   |
| PROK2_P390_F       | Y |                   |   |                   |   |              |   |
| NRG1_P558_R        | Y |                   |   |                   |   |              |   |
| TGFB_P173_F        | Y |                   |   |                   |   |              |   |
| FZD9_P175_F        | Y |                   |   |                   |   |              |   |
| MEST_P62_R         | Y |                   |   |                   |   |              |   |







**Supplementary Table 9.** List of CpG sites differentially methylated in cancer cell lines. CpG island associated (CGI): Yes (Y) or not (N). TSS: transcription start site.

| CpG site (n: 41)  | CGI | Annotation                                                                                                                                                   | Distance to TSS |
|-------------------|-----|--------------------------------------------------------------------------------------------------------------------------------------------------------------|-----------------|
| CCND2_P898_R      | Y   | cyclin D2 (CCND2)                                                                                                                                            | -898            |
| CDKN1C_P626_F     | Y   | cyclin-dependent kinase inhibitor 1C (p57, Kip2) (CDKN1C)                                                                                                    | -626            |
| COL18A1_P365_R    | Y   | collagen, type XVIII, alpha 1 (COL18A1), transcript variant 3                                                                                                | -365            |
| COL1A2_P48_R      | Y   | collagen, type I, alpha 2 (COL1A2)                                                                                                                           | -48             |
| CTLA4_P1128_F     | N   | cytotoxic T-lymphocyte-associated protein 4 (CTLA4)                                                                                                          | -1128           |
| DES_E228_R        | Y   | desmin (DES)                                                                                                                                                 | 228             |
| EFNB3_P442_R      | Y   | ephrin-B3 (EFNB3)                                                                                                                                            | -442            |
| ESR2_E66_F        | Y   | estrogen receptor 2 (ER beta) (ESR2)                                                                                                                         | 66              |
| FABP3_P598_F      | Y   | fatty acid binding protein 3, muscle and heart (mammary-derived growth inhibitor) (FABP3)                                                                    | -598            |
| FES_E34_R         | Y   | feline sarcoma oncogene (FES)                                                                                                                                | 34              |
| FES_P223_R        | Y   | feline sarcoma oncogene (FES)                                                                                                                                | -223            |
| GABRA5_P1016_F    | N   | gamma-aminobutyric acid (GABA) A receptor, alpha 5 (GABRA5)                                                                                                  | -1016           |
| GABRG3_E123_R     | N   | gamma-aminobutyric acid (GABA) A receptor, gamma 3 (GABRG3)                                                                                                  | 123             |
| GABRG3_P75_F      | N   | gamma-aminobutyric acid (GABA) A receptor, gamma 3 (GABRG3)                                                                                                  | -75             |
| GJB2_P791_R       | Y   | gap junction protein, beta 2, 26kDa (connexin 26) (GJB2)                                                                                                     | -791            |
| HCK_P46_R         | Y   | hemopoietic cell kinase (HCK)                                                                                                                                | -46             |
| HOXA11_E35_F      | Y   | homeo box A11 (HOXA11)                                                                                                                                       | 35              |
| HTR2A_P853_F      | N   | 5-hydroxytryptamine (serotonin) receptor 2A (HTR2A)                                                                                                          | -853            |
| IAPP_E280_F       | N   | islet amyloid polypeptide (IAPP)                                                                                                                             | 280             |
| IGFBP2_P306_F     | Y   | insulin-like growth factor binding protein 2, 36kDa (IGFBP2)                                                                                                 | -306            |
| KCNK4_E3_F        | Y   | potassium channel, subfamily K, member 4 (KCNK4), transcript variant 1                                                                                       | 3               |
| KIAA0125_E29_F    | N   | KIAA0125 (KIAA0125)                                                                                                                                          | 29              |
| MATK_P64_F        | Y   | megakaryocyte-associated tyrosine kinase (MATK), transcript variant 1                                                                                        | -64             |
| P2RX7_E323_R      | Y   | purinergic receptor P2X, ligand-gated ion channel, 7 (P2RX7), transcript variant 2                                                                           | 323             |
| P2RX7_P119_R      | N   | purinergic receptor P2X, ligand-gated ion channel, 7 (P2RX7), transcript variant 2                                                                           | -119            |
| PGR_E183_R        | N   | progesterone receptor (PGR)                                                                                                                                  | 183             |
| PMP22_P975_F      | N   | peripheral myelin protein 22 (PMP22), transcript variant 1                                                                                                   | -975            |
| PODXL_P1341_R     | Y   | podocalyxin-like (PODXL), transcript variant 1                                                                                                               | -1341           |
| POMC_E254_F       | Y   | proopiomelanocortin (adrenocorticotropin/ beta-lipotropin/ alpha-melanocyte stimulating hormone/ beta-melanocyte stimulating hormone/ beta-endorphin) (POMC) | 254             |
| PROM1_P44_R       | N   | prominin 1 (PROM1)                                                                                                                                           | -44             |
| PWCR1_P357_F      | N   | Prader-Willi syndrome chromosome region 1 (PWCR1) on chromosome 15.                                                                                          | -357            |
| PYCARD_E87_F      | Y   | PYD and CARD domain containing (PYCARD), transcript variant 2                                                                                                | 87              |
| RASGRF1_E16_F     | Y   | Ras protein-specific guanine nucleotide-releasing factor 1 (RASGRF1), transcript variant 1                                                                   | 16              |
| RET_seq_54_S260_F | Y   | ret proto-oncogene (multiple endocrine neoplasia and medullary thyroid carcinoma 1, Hirschsprung disease) (RET), transcript variant 4                        | 11              |
| SLC5A8_P38_R      | Y   | solute carrier family 5 (iodide transporter), member 8 (SLC5A8)                                                                                              | -38             |
| SYBL1_E23_R       | Y   | synaptobrevin-like 1 (SYBL1)                                                                                                                                 | 23              |
| TAL1_E122_F       | Y   | T-cell acute lymphocytic leukemia 1 (TAL1)                                                                                                                   | 122             |
| TNFRSF10C_E109_F  | Y   | tumor necrosis factor receptor superfamily, member 10c, decoy without an intracellular domain (TNFRSF10C)                                                    | 109             |
| TNFRSF1B_E5_F     | Y   | tumor necrosis factor receptor superfamily, member 1B (TNFRSF1B)                                                                                             | 5               |
| USP29_E274_F      | N   | ubiquitin specific peptidase 29 (USP29)                                                                                                                      | 274             |
| WNT8B_E487_F      | N   | wingless-type MMTV integration site family, member 8B (WNT8B)                                                                                                | 487             |

**Supplementary Table 10.** List of CpG sites with brain metastasis-dependent hypermethylation in colorectal cancer patients. CpG island associated (CGI): Yes (Y) or not (N). TSS: transcription start site.

| CpG site (n: 41)    | CGI | Annotation                                                                                                                    | Distance to TSS |
|---------------------|-----|-------------------------------------------------------------------------------------------------------------------------------|-----------------|
| ALPL_P433_F         | Y   | alkaline phosphatase, liver/bone/kidney (ALPL)                                                                                | -433            |
| CCNA1_E7_F          | Y   | cyclin A1 (CCNA1)                                                                                                             | 7               |
| CD40_E58_R          | Y   | CD40 antigen (TNF receptor superfamily member 5) (CD40), transcript variant 2                                                 | 58              |
| COL18A1_P494_R      | Y   | collagen, type XVIII, alpha 1 (COL18A1), transcript variant 3                                                                 | -494            |
| DCC_P177_F          | Y   | deleted in colorectal carcinoma (DCC)                                                                                         | -177            |
| DES_E228_R          | Y   | desmin (DES)                                                                                                                  | 228             |
| EPHA5_P66_F         | Y   | EPH receptor A5 (EPHA5), transcript variant 2                                                                                 | -66             |
| FGF2_P229_F         | Y   | fibroblast growth factor 2 (basic) (FGF2)                                                                                     | -229            |
| FGF8_P473_F         | Y   | fibroblast growth factor 8 (androgen-induced) (FGF8), transcript variant B                                                    | -473            |
| FGFR1_P204_F        | Y   | fibroblast growth factor receptor 1 (fms-related tyrosine kinase 2, Pfeiffer syndrome) (FGFR1), transcript variant 1          | -204            |
| FZD9_E458_F         | Y   | frizzled homolog 9 (Drosophila) (FZD9)                                                                                        | 458             |
| GALR1_E52_F         | Y   | galanin receptor 1 (GALR1)                                                                                                    | 52              |
| GSTM1_P266_F        | Y   | glutathione S-transferase M1 (GSTM1), transcript variant 2                                                                    | -266            |
| HHIP_P307_R         | Y   | hedgehog interacting protein (HHIP)                                                                                           | -307            |
| IPF1_P750_F         | Y   | insulin promoter factor 1, homeodomain transcription factor (IPF1)                                                            | -750            |
| KRAS_E82_F          | Y   | v-Ki-ras2 Kirsten rat sarcoma viral oncogene homolog (KRAS), transcript variant a                                             | 82              |
| MEG3_E91_F          | Y   | PREDICTED: maternally expressed 3, transcript variant 10 (MEG3), misc RNA.                                                    | 91              |
| MMP2_E21_R          | Y   | matrix metalloproteinase 2 (gelatinase A, 72kDa gelatinase, 72kDa type IV collagenase) (MMP2)                                 | 21              |
| MMP2_P197_F         | Y   | matrix metalloproteinase 2 (gelatinase A, 72kDa gelatinase, 72kDa type IV collagenase) (MMP2)                                 | -197            |
| MSH3_P13_R          | Y   | mutS homolog 3 (E. coli) (MSH3)                                                                                               | -13             |
| NEFL_E23_R          | Y   | neurofilament, light polypeptide 68kDa (NEFL)                                                                                 | 23              |
| NPR2_P618_F         | Y   | natriuretic peptide receptor B/guanylate cyclase B (atrionatriuretic peptide receptor B) (NPR2)                               | -618            |
| NRG1_E74_F          | Y   | neuregulin 1 (NRG1), transcript variant HRG-beta3                                                                             | 74              |
| PDE1B_E141_F        | Y   | phosphodiesterase 1B, calmodulin-dependent (PDE1B)                                                                            | 141             |
| PDGFB_P719_F        | N   | platelet-derived growth factor beta polypeptide (simian sarcoma viral (v-sis) oncogene homolog) (PDGFB), transcript variant 1 | -719            |
| PENK_E26_F          | Y   | proenkephalin (PENK)                                                                                                          | 26              |
| PLA2G2A_E268_F      | N   | phospholipase A2, group IIA (platelets, synovial fluid) (PLA2G2A)                                                             | 268             |
| PPAT_E170_R         | Y   | phosphoribosyl pyrophosphate amidotransferase (PPAT)                                                                          | -266            |
| RBP1_E158_F         | Y   | retinol binding protein 1, cellular (RBP1)                                                                                    | 158             |
| RBP1_P426_R         | Y   | retinol binding protein 1, cellular (RBP1)                                                                                    | -426            |
| SEPT5_P464_R        | Y   | septin 5 (SEPT5), transcript variant 2                                                                                        | -464            |
| SERPINE1_P519_F     | N   | serpin peptidase inhibitor, clade E (nexin, plasminogen activator inhibitor type 1), member 1 (SERPINE1)                      | -519            |
| SEZ6L_P249_F        | Y   | seizure related 6 homolog (mouse)-like (SEZ6L)                                                                                | -249            |
| SLC5A8_E60_R        | Y   | solute carrier family 5 (iodide transporter), member 8 (SLC5A8)                                                               | 60              |
| SNRPN_seq_12_S127_F | Y   | small nuclear ribonucleoprotein polypeptide N (SNRPN), transcript variant 3                                                   | -11             |
| SPARC_E50_R         | Y   | secreted protein, acidic, cysteine-rich (osteonectin) (SPARC)                                                                 | 50              |
| STAT5A_P704_R       | N   | signal transducer and activator of transcription 5A (STAT5A)                                                                  | -704            |
| TBX1_P520_F         | N   | T-box 1 (TBX1), transcript variant A                                                                                          | -520            |
| TERT_P360_R         | Y   | telomerase reverse transcriptase (TERT), transcript variant 2                                                                 | -360            |
| THY1_P20_R          | Y   | Thy-1 cell surface antigen (THY1)                                                                                             | -20             |
| TJP2_P330_R         | Y   | tight junction protein 2 (zona occludens 2) (TJP2), transcript variant 1                                                      | -330            |
| TPEF_seq_44_S36_F   | Y   | transmembrane protein with EGF-like and two follistatin-like domains 2 (TMEFF2)                                               | 442             |
| ZNF264_E48_R        | Y   | zinc finger protein 264 (ZNF264)                                                                                              | 48              |

**Supplementary Table 11.** List of CpG sites with non-cancer disease specific hypomethylation. CpG island associated (CGI): Yes (Y) or not (N).

| Dementia (n:96)     | CGI | Lupus (n:45)      | CGI |
|---------------------|-----|-------------------|-----|
| ALPL_P433_F         | Y   | AOC3_P890_R       | N   |
| AOC3_P890_R         | N   | B3GALT5_P330_F    | N   |
| ARHGDI1_P148_R      | N   | BLK_P668_R        | N   |
| C4B_E171_F          | N   | CCL3_E53_R        | N   |
| CARD15_P302_R       | N   | CLDN4_P1120_R     | N   |
| CARD15_P665_F       | N   | CPA4_P1265_R      | N   |
| CASP10_E139_F       | N   | CTLA4_E176_R      | N   |
| CASP10_P186_F       | N   | CYP2E1_E53_R      | N   |
| CASP10_P334_F       | N   | DIRAS3_P745_F     | Y   |
| CD34_P780_R         | N   | DMP1_P134_F       | N   |
| CD9_P585_R          | Y   | E2F5_P516_R       | Y   |
| CEACAM1_E57_R       | N   | EV12A_E420_F      | N   |
| CSF1R_P73_F         | N   | FOSL2_E384_R      | Y   |
| DDR2_P743_R         | N   | GPR116_P850_F     | N   |
| DIRAS3_P745_F       | Y   | GSTM1_P363_F      | Y   |
| EPHX1_E152_F        | N   | HOXA5_P479_F      | Y   |
| EV12A_E420_F        | N   | IFNG_E293_F       | N   |
| EYA4_P794_F         | Y   | IFNG_P188_F       | N   |
| FAS_P322_R          | N   | IFNG_P459_R       | N   |
| FGF1_E5_F           | N   | IL12B_P392_R      | N   |
| FGF7_P610_F         | N   | IL18BP_E285_F     | N   |
| GP1BB_E23_F         | Y   | ITK_E166_R        | N   |
| GP1BB_P278_R        | Y   | ITK_P114_F        | N   |
| GPR116_P850_F       | N   | KRAS_E82_F        | Y   |
| GSTM1_P266_F        | Y   | KRT5_P308_F       | N   |
| GSTM1_P363_F        | Y   | LCK_E28_F         | Y   |
| HCK_P858_F          | Y   | LTA_P214_R        | N   |
| HLA-DPA1_P205_R     | N   | NOS2A_P288_R      | N   |
| HLA-DQA2_E93_F      | N   | PGR_E183_R        | N   |
| IGFBP6_E47_F        | N   | PI3_P1394_R       | N   |
| IL16_P93_R          | N   | PLA2G2A_P528_F    | N   |
| IL1RN_P93_R         | N   | PMP22_P1254_F     | N   |
| IL8_E118_R          | N   | PMP22_P975_F      | N   |
| KRT13_P676_F        | N   | PTHR1_E36_R       | N   |
| LEFTY2_P561_F       | N   | RAN_P581_R        | Y   |
| LEFTY2_P719_F       | N   | RUNX3_E27_R       | N   |
| LTB4R_E64_R         | N   | RUNX3_P247_F      | Y   |
| MAPK10_E26_F        | N   | RUNX3_P393_R      | Y   |
| MAPK4_E273_R        | N   | SFTPB_P689_R      | N   |
| MEG3_P235_F         | Y   | SMARCB1_P220_R    | Y   |
| MMP14_P13_F         | Y   | SOD3_P225_F       | N   |
| MMP2_P303_R         | Y   | TNFRSF10C_P612_R  | N   |
| MOS_P746_F          | N   | WNT8B_P216_R      | N   |
| MPO_P883_R          | N   | Xist_seq_80_S47_R | N   |
| MSH3_P13_R          | Y   | Xist_seq_80_S95_R | N   |
| MST1R_P392_F        | Y   |                   |     |
| NBL1_E205_R         | N   |                   |     |
| NBL1_P24_F          | N   |                   |     |
| NGFR_P355_F         | Y   |                   |     |
| NOS2A_P288_R        | N   |                   |     |
| NOTCH4_P938_F       | N   |                   |     |
| OSM_P188_F          | Y   |                   |     |
| OSM_P34_F           | N   |                   |     |
| P2RX7_P597_F        | N   |                   |     |
| PECAM1_E32_R        | Y   |                   |     |
| PEG3_E496_F         | Y   |                   |     |
| PLAGL1_E68_R        | Y   |                   |     |
| PLAGL1_P236_R       | Y   |                   |     |
| POMC_P400_R         | Y   |                   |     |
| PRKDCBP_P352_R      | Y   |                   |     |
| PSCA_E359_F         | N   |                   |     |
| PTK6_E50_F          | Y   |                   |     |
| PTPN6_E171_R        | Y   |                   |     |
| PTPRH_E173_F        | N   |                   |     |
| RARA_P1076_R        | N   |                   |     |
| RBP1_P426_R         | Y   |                   |     |
| S100A2_E36_R        | N   |                   |     |
| SEPT5_P464_R        | Y   |                   |     |
| SERPINE1_P519_F     | N   |                   |     |
| SGCE_P250_R         | Y   |                   |     |
| SLC14A1_E295_F      | N   |                   |     |
| SLC6A8_P409_F       | Y   |                   |     |
| SNRPN_seq_12_S127_F | Y   |                   |     |
| SNRPN_seq_18_S99_F  | Y   |                   |     |
| SNURF_P2_R          | Y   |                   |     |
| SNURF_P78_F         | Y   |                   |     |
| SOD3_P460_R         | N   |                   |     |
| SPI1_E205_F         | Y   |                   |     |
| STAT5A_E42_F        | N   |                   |     |
| TBX1_P520_F         | N   |                   |     |
| TEK_E75_F           | N   |                   |     |
| TGFB3_E58_R         | N   |                   |     |
| TIMP1_P615_R        | N   |                   |     |
| TNFRSF1A_P678_F     | N   |                   |     |
| TNFRSF8_P184_F      | Y   |                   |     |
| TRIP6_P1090_F       | Y   |                   |     |
| TRIP6_P1274_R       | Y   |                   |     |
| TSP50_E21_R         | Y   |                   |     |
| TSP50_P137_F        | Y   |                   |     |
| VAMP8_P114_F        | N   |                   |     |
| VAV1_E9_F           | Y   |                   |     |
| VAV1_P317_F         | N   |                   |     |
| WNT10B_P823_R       | Y   |                   |     |
| XPC_P226_R          | Y   |                   |     |
| ZIM2_E110_F         | Y   |                   |     |
| ZIM2_P22_F          | Y   |                   |     |
